# Supplementary material for: Inclusive coordination of F−, Cl−and Br−anions into macrobicyclic polyammonium receptors
Source: Royal Society of Chemistry journal article supplement (doi:10.1039/b602795d), 2006-01-01

## Supplementary material

- S1 - Cartesian Coordinates (lowest energy conformer), atomic charges and atom types for the  $[\text{L1H}_4]^{4+}$
  - S2 - Cartesian Coordinates for the  $[\text{L1H}_4\text{F}]^{3+}$  lowest energy conformer
  - S3 - Cartesian Coordinates for the  $[\text{L1H}_4\text{Cl}]^{3+}$  lowest energy conformer
  - S4 - Cartesian Coordinates for the  $[\text{L1H}_4\text{Br}]^{3+}$  lowest energy conformer
  - S5 - Cartesian Coordinates (lowest energy conformer), atomic charges and atom types for the  $[\text{L1H}_5]^{5+}$
  - S6 - Cartesian Coordinates for the  $[\text{L1H}_5\text{F}]^{4+}$  lowest energy conformer
  - S7 - Cartesian Coordinates (lowest energy conformer), atomic charges and atom types for the  $[\text{L2H}_4]^{4+}$
  - S8 - Cartesian Coordinates for the  $[\text{L2H}_4\text{F}]^{3+}$  lowest energy conformer
  - S9 - Cartesian Coordinates for the  $[\text{L2H}_4\text{F}(\text{H}_2\text{O})]^{3+}$  lowest energy conformer
  - S10 - Cartesian Coordinates for the  $[\text{L2H}_4\text{Cl}]^{3+}$  lowest energy conformer
  - S11 - Cartesian Coordinates for the  $[\text{L2H}_4\text{Br}]^{3+}$  lowest energy conformer
  - S12 - Cartesian Coordinates, atomic charges and atom types for the cluster  $[\text{F}(\text{H}_2\text{O})_{12}]^{12+}$
  - S13 - Cartesian Coordinates, atomic charges and atom types for the cluster  $[\text{Cl}(\text{H}_2\text{O})_{12}]^{12+}$
  - S14 - Cartesian Coordinates, atomic charges and atom types for the cluster  $[\text{Br}(\text{H}_2\text{O})_{12}]^{12+}$
  - S15 - Cartesian Coordinates, atomic charges and atom types for the cluster of twelve  $\text{H}_2\text{O}$
  - S16 - Cartesian Coordinates (lowest energy conformer), atomic charges and atom types for the  $[\text{L2H}_2]^{2+}$
  - S17 - Cartesian Coordinates (lowest energy conformer), atomic charges and atom types for the  $[\text{L2H}_3]^{3+}$
  - S18 – Energy values (kcal/mol) for the lowest energy conformers used in  $\Delta E$  reaction energy calculations.
- Figure S1 - Lowest energy conformer of  $[\text{L2H}_2]^{2+}$
- Figure S2 - Lowest energy conformer of  $[\text{L2H}_3]^{3+}$

S1 - Cartesian Coordinates (lowest energy conformer), atomic charges and atom types for the  $[L1H_4]^{4+}$ 

|     | x       | y       | z       | atom type | atomic charge |
|-----|---------|---------|---------|-----------|---------------|
| N1  | 2.4720  | 1.7350  | 4.3530  | N3        | -0.1232858    |
| C2  | 3.1620  | 0.4470  | 4.1790  | C4        | -0.1168203    |
| C3  | 3.3910  | -0.1330 | 2.7450  | C4        | -0.2887998    |
| N4  | 4.3990  | 0.5060  | 1.9020  | N3        | 0.7529426     |
| C5  | 4.0100  | 1.8710  | 1.5900  | C4        | -0.2847452    |
| C6  | 5.0060  | 2.8300  | 0.8760  | C4        | -0.1128383    |
| N7  | 4.7000  | 4.2340  | 1.1840  | N3        | -0.1304092    |
| C8  | 5.6730  | 5.1830  | 0.6400  | C4        | -0.09859705   |
| C9  | 7.1640  | 5.1070  | 1.0910  | C4        | -0.2995677    |
| N10 | 7.4930  | 5.5200  | 2.4540  | N3        | 0.7620044     |
| C11 | 7.0840  | 4.5130  | 3.4270  | C4        | -0.2966194    |
| C12 | 7.1150  | 4.9060  | 4.9300  | C4        | -0.1052728    |
| N13 | 6.4990  | 3.8810  | 5.7790  | N3        | -0.134572     |
| C14 | 6.1240  | 4.3970  | 7.0950  | C4        | -0.09803104   |
| C15 | 5.3050  | 3.4490  | 8.0240  | C4        | -0.2981758    |
| N16 | 3.9320  | 3.1270  | 7.6490  | N3        | 0.7308006     |
| C17 | 3.8490  | 2.3590  | 6.4050  | C4        | -0.287056     |
| C18 | 2.4430  | 2.1470  | 5.7660  | C4        | -0.1077161    |
| C19 | 1.1390  | 1.7280  | 3.7340  | C4        | -0.09953547   |
| C20 | 0.2220  | 2.9720  | 3.8930  | C4        | -0.1379271    |
| C21 | 0.7670  | 4.3160  | 3.3260  | C4        | -0.2595148    |
| N22 | 0.4280  | 4.7040  | 1.9540  | N3        | 0.7595921     |
| C23 | 1.1920  | 5.8670  | 1.4960  | C4        | -0.2751694    |
| C24 | 2.7500  | 5.8220  | 1.5280  | C4        | -0.1230512    |
| C25 | 3.3320  | 4.6000  | 0.7870  | C4        | -0.1042886    |
| C26 | 4.6850  | -0.2560 | 0.7110  | C4        | -0.3168936    |
| C27 | 8.8940  | 5.8440  | 2.5880  | C4        | -0.3035707    |
| C28 | 7.3490  | 2.7030  | 5.8890  | C4        | -0.1239672    |
| C29 | 3.2300  | 2.4650  | 8.7260  | C4        | -0.2639089    |
| C30 | -0.9890 | 4.9280  | 1.7700  | C4        | -0.3261709    |
| H31 | 4.1760  | 0.5070  | 4.6380  | H         | 0.08973336    |
| H32 | 2.6130  | -0.3250 | 4.7850  | H         | 0.1315051     |
| H33 | 2.4330  | -0.2510 | 2.1880  | H         | 0.1252506     |
| H34 | 3.7390  | -1.1880 | 2.8880  | H         | 0.1635857     |
| H35 | 3.0710  | 1.7820  | 0.9950  | H         | 0.1638026     |
| H36 | 5.0160  | 2.6780  | -0.2360 | H         | 0.1345687     |
| H37 | 6.0330  | 2.5970  | 1.2390  | H         | 0.07480919    |
| H38 | 5.6390  | 5.1160  | -0.4810 | H         | 0.1283238     |
| H39 | 5.3280  | 6.2210  | 0.8660  | H         | 0.09504187    |
| H40 | 7.7000  | 5.8200  | 0.4150  | H         | 0.1642817     |
| H41 | 7.6410  | 4.1280  | 0.8540  | H         | 0.1378438     |
| H42 | 6.0290  | 4.2480  | 3.2040  | H         | 0.1414788     |
| H43 | 7.7110  | 3.6110  | 3.2440  | H         | 0.1606733     |
| H44 | 6.5450  | 5.8620  | 5.0290  | H         | 0.0702315     |
| H45 | 8.1460  | 5.1230  | 5.3160  | H         | 0.1331677     |
| H46 | 7.0600  | 4.7080  | 7.6310  | H         | 0.09761429    |
| H47 | 5.5450  | 5.3480  | 6.9730  | H         | 0.1295662     |
| H48 | 5.2510  | 3.9860  | 9.0030  | H         | 0.1291959     |
| H49 | 5.8650  | 2.5170  | 8.2740  | H         | 0.163027      |
| H50 | 4.4360  | 2.9090  | 5.6420  | H         | 0.1175251     |
| H51 | 4.3520  | 1.3830  | 6.6020  | H         | 0.1629232     |
| H52 | 1.8230  | 1.4150  | 6.3480  | H         | 0.1272562     |
| H53 | 1.9230  | 3.1310  | 5.8350  | H         | 0.1044365     |
| H54 | 1.2550  | 1.5810  | 2.6370  | H         | 0.05151916    |
| H55 | 0.5720  | 0.8360  | 4.1110  | H         | 0.1243639     |
| H56 | -0.0560 | 3.0880  | 4.9720  | H         | 0.1204497     |

|     |         |         |         |    |             |
|-----|---------|---------|---------|----|-------------|
| H57 | 1.8710  | 4.2590  | 3.4290  | H  | 0.06074953  |
| H58 | 0.4310  | 5.1560  | 3.9830  | H  | 0.1547314   |
| H59 | 0.8940  | 6.0610  | 0.4360  | H  | 0.154878    |
| H60 | 0.8600  | 6.7660  | 2.0710  | H  | 0.07020187  |
| H61 | 3.1380  | 5.8680  | 2.5750  | H  | 0.1228747   |
| H62 | 3.1340  | 6.7640  | 1.0550  | H  | 0.1264696   |
| H63 | 3.2600  | 4.7320  | -0.3240 | H  | 0.1207596   |
| H64 | 2.6300  | 3.7790  | 1.0240  | H  | 0.04614156  |
| H65 | 5.0740  | -1.2660 | 0.9780  | H  | 0.1033732   |
| H66 | 5.4890  | 0.2280  | 0.1140  | H  | 0.1029828   |
| H67 | 3.7890  | -0.3940 | 0.0620  | H  | 0.1618072   |
| H68 | 9.1180  | 6.2550  | 3.5970  | H  | 0.163775    |
| H69 | 9.1800  | 6.6610  | 1.8860  | H  | 0.08838391  |
| H70 | 9.5550  | 4.9680  | 2.3960  | H  | 0.1012784   |
| H71 | 7.5820  | 2.2640  | 4.8950  | H  | 0.05357218  |
| H72 | 6.8520  | 1.8800  | 6.4460  | H  | 0.06990606  |
| H73 | 8.3130  | 2.9270  | 6.4070  | H  | 0.1040697   |
| H74 | 2.1540  | 2.3320  | 8.4810  | H  | 0.1104235   |
| H75 | 3.2450  | 3.0880  | 9.6510  | H  | 0.1556007   |
| H76 | -1.5860 | 4.0170  | 1.9820  | H  | 0.1354437   |
| H77 | -1.2170 | 5.1790  | 0.7090  | H  | 0.1376659   |
| H78 | -1.3700 | 5.7610  | 2.4060  | H  | 0.156918    |
| H79 | 3.4560  | 4.0150  | 7.4820  | HB | 0.003589272 |
| H80 | 6.9620  | 6.3700  | 2.6480  | HB | 0.005359113 |
| H81 | 0.6890  | 3.9210  | 1.3510  | HB | 0.0073663   |
| H82 | 5.2620  | 0.5540  | 2.4470  | HB | 0.01293588  |
| H83 | -0.7760 | 2.7140  | 3.4570  | H  | 0.1145327   |
| H84 | 3.6740  | 1.4730  | 8.9710  | H  | 0.09118342  |
| H85 | 3.7890  | 2.3550  | 2.5630  | H  | 0.1320156   |

S2 - Cartesian Coordinates for the [L1H<sub>4</sub>F]<sup>3+</sup> lowest energy conformer

|     | x       | y       | z      |
|-----|---------|---------|--------|
| N1  | 4.8880  | 0.9910  | 3.8690 |
| C2  | 4.8580  | 0.9150  | 5.3300 |
| C3  | 5.5230  | 2.1160  | 6.0450 |
| N4  | 5.0140  | 3.4260  | 5.6470 |
| C5  | 5.9350  | 4.4780  | 6.0690 |
| C6  | 5.6640  | 5.8520  | 5.4100 |
| N7  | 5.4170  | 5.7220  | 3.9780 |
| C8  | 4.7730  | 6.9130  | 3.4280 |
| C9  | 3.2640  | 7.0220  | 3.7840 |
| N10 | 2.3950  | 5.9160  | 3.3760 |
| C11 | 1.0180  | 6.1700  | 3.8050 |
| C12 | -0.0190 | 5.0570  | 3.4980 |
| N13 | 0.4090  | 3.7610  | 4.0110 |
| C14 | -0.2440 | 2.6420  | 3.3410 |
| C15 | 0.5340  | 1.3140  | 3.5370 |
| N16 | 1.9620  | 1.3410  | 3.2160 |
| C17 | 2.5730  | 0.0460  | 3.5260 |
| C18 | 4.1000  | -0.0800 | 3.2650 |
| C19 | 6.2500  | 1.0950  | 3.3430 |
| C20 | 6.3870  | 1.2150  | 1.8100 |
| C21 | 7.7990  | 1.6640  | 1.3520 |
| N22 | 8.2860  | 3.0060  | 1.6700 |
| C23 | 7.4760  | 4.0880  | 1.1150 |
| C24 | 6.2430  | 4.5920  | 1.9120 |
| C25 | 6.6070  | 5.3220  | 3.2220 |
| C26 | 3.6970  | 3.6550  | 6.1960 |
| C27 | 2.4630  | 5.7110  | 1.9500 |
| C28 | 0.2390  | 3.6890  | 5.4560 |
| C29 | 2.1850  | 1.7010  | 1.8370 |
| C30 | 9.6650  | 3.1330  | 1.2400 |
| H31 | 3.8080  | 0.8450  | 5.6910 |
| H32 | 5.3350  | -0.0430 | 5.6660 |
| H33 | 6.6190  | 2.0530  | 5.8690 |
| H34 | 5.4250  | 2.0090  | 7.1530 |
| H35 | 5.9100  | 4.5680  | 7.1820 |
| H36 | 6.5090  | 6.5670  | 5.5930 |
| H37 | 4.7940  | 6.3190  | 5.9250 |
| H38 | 5.3250  | 7.8260  | 3.7750 |
| H49 | 4.8900  | 6.9630  | 2.3210 |
| H50 | 2.8720  | 7.9630  | 3.3290 |
| H51 | 3.1500  | 7.1590  | 4.8820 |
| H52 | 1.0200  | 6.3610  | 4.9010 |
| H53 | 0.6580  | 7.1180  | 3.3370 |
| H54 | -0.1900 | 5.0180  | 2.3970 |
| H55 | -1.0320 | 5.3140  | 3.9070 |
| H56 | -1.2980 | 2.5460  | 3.7080 |
| H57 | -0.3710 | 2.8450  | 2.2490 |
| H58 | 0.0340  | 0.5240  | 2.9260 |
| H59 | 0.4150  | 0.9840  | 4.5930 |
| H60 | 2.3520  | -0.2110 | 4.5860 |
| H61 | 2.0510  | -0.7430 | 2.9320 |
| H62 | 4.4830  | -1.0750 | 3.6140 |
| H63 | 4.2470  | -0.1100 | 2.1620 |
| H64 | 6.6990  | 2.0300  | 3.7410 |

|     |         |        |        |
|-----|---------|--------|--------|
| H65 | 6.8620  | 0.2320 | 3.7090 |
| H66 | 5.5890  | 1.8600 | 1.3730 |
| H67 | 7.8560  | 1.5260 | 0.2450 |
| H68 | 8.5210  | 0.9290 | 1.7810 |
| H69 | 8.1220  | 4.9870 | 0.9760 |
| H70 | 7.1700  | 3.8050 | 0.0790 |
| H71 | 5.4920  | 3.8010 | 2.1580 |
| H72 | 5.6880  | 5.2900 | 1.2380 |
| H73 | 7.2610  | 6.2110 | 3.0410 |
| H74 | 7.2180  | 4.6000 | 3.8040 |
| H75 | 3.3150  | 4.6380 | 5.8590 |
| H76 | 3.6670  | 3.5960 | 7.3070 |
| H77 | 3.0090  | 2.9150 | 5.7450 |
| H78 | 1.8380  | 4.8420 | 1.6790 |
| H79 | 3.4840  | 5.3960 | 1.6620 |
| H80 | 2.1450  | 6.6070 | 1.3710 |
| H81 | -0.8330 | 3.7850 | 5.7490 |
| H82 | 0.8070  | 4.4880 | 5.9780 |
| H83 | 0.6140  | 2.7320 | 5.8760 |
| H84 | 3.2700  | 1.8380 | 1.6600 |
| H85 | 1.7640  | 2.7050 | 1.6570 |
| H86 | 10.1030 | 4.0980 | 1.5830 |
| H87 | 9.7570  | 3.0710 | 0.1300 |
| H88 | 10.3050 | 2.3420 | 1.6900 |
| H89 | 2.3950  | 2.0340 | 3.8200 |
| H90 | 2.7120  | 5.0820 | 3.8570 |
| H91 | 8.2780  | 3.1070 | 2.6860 |
| H92 | 4.9670  | 3.4470 | 4.6300 |
| H93 | 6.2080  | 0.2060 | 1.3540 |
| H94 | 1.7500  | 0.9630 | 1.1250 |
| H95 | 6.9810  | 4.1820 | 5.8370 |
| F96 | 3.4200  | 3.5020 | 3.5450 |

S3 - Cartesian Coordinates for the  $[\text{L1H}_4\text{Cl}]^{3+}$  lowest energy conformer

|     | x       | y       | z       |
|-----|---------|---------|---------|
| N1  | 0.9610  | 3.8120  | 2.2890  |
| C2  | 0.6750  | 4.0760  | 3.7010  |
| C3  | 0.5370  | 2.8040  | 4.5870  |
| N4  | 1.6310  | 1.8380  | 4.5100  |
| C5  | 1.3220  | 0.6130  | 5.2430  |
| C6  | 2.3140  | -0.5760 | 5.0690  |
| N7  | 2.4580  | -1.0300 | 3.6850  |
| C8  | 3.6460  | -1.8740 | 3.4900  |
| C9  | 5.0450  | -1.2030 | 3.6360  |
| N10 | 5.4110  | -0.1210 | 2.7230  |
| C11 | 6.7510  | 0.3870  | 3.0170  |
| C12 | 7.1040  | 1.7630  | 2.3880  |
| N13 | 6.1910  | 2.8400  | 2.7710  |
| C14 | 6.4070  | 4.0490  | 1.9780  |
| C15 | 5.2100  | 5.0400  | 2.0320  |
| N16 | 3.9160  | 4.5190  | 1.5910  |
| C17 | 2.8390  | 5.4720  | 1.8690  |
| C18 | 1.3790  | 5.0170  | 1.5720  |
| C19 | -0.1430 | 3.1110  | 1.6260  |
| C20 | 0.1990  | 2.5610  | 0.2220  |
| C21 | -0.6140 | 1.3080  | -0.2040 |
| N22 | 0.0000  | 0.0000  | 0.0000  |
| C23 | 0.2440  | -0.3160 | 1.3980  |
| C24 | 0.9600  | -1.6530 | 1.7260  |
| C25 | 1.2590  | -1.7560 | 3.2420  |
| C26 | 2.8630  | 2.4270  | 4.9840  |
| C27 | 5.3140  | -0.5420 | 1.3430  |
| C28 | 6.2720  | 3.1260  | 4.1970  |
| C29 | 3.9690  | 4.1520  | 0.1940  |
| C30 | 1.4590  | 4.7360  | 4.1380  |
| H31 | -0.2590 | 4.6930  | 3.7760  |
| H32 | -0.4170 | 2.2930  | 4.3300  |
| H33 | 0.4030  | 3.1150  | 5.6510  |
| H34 | 1.2310  | 0.8550  | 6.3290  |
| H35 | 2.0000  | -1.4420 | 5.7100  |
| H36 | 3.2980  | -0.2820 | 5.4950  |
| H37 | 3.5920  | -2.7320 | 4.2110  |
| H38 | 3.5930  | -2.3740 | 2.4940  |
| H49 | 5.8190  | -2.0030 | 3.5330  |
| H50 | 5.1570  | -0.8250 | 4.6740  |
| H51 | 6.8980  | 0.4570  | 4.1160  |
| H52 | 7.5030  | -0.3710 | 2.6860  |
| H53 | 7.1140  | 1.6580  | 1.2780  |
| H54 | 8.1560  | 2.0560  | 2.6480  |
| H55 | 7.3440  | 4.5580  | 2.3230  |
| H56 | 6.6380  | 3.7910  | 0.9150  |
| H57 | 5.4650  | 5.9420  | 1.4250  |
| H58 | 5.1090  | 5.4200  | 3.0720  |
| H59 | 2.9030  | 5.7710  | 2.9380  |
| H60 | 3.0460  | 6.4050  | 1.2900  |
| H61 | 0.6570  | 5.8460  | 1.7940  |
| H62 | 1.2660  | 4.8870  | 0.4720  |
| H63 | -0.4370 | 2.2380  | 2.2420  |
| H64 | -1.0480 | 3.7680  | 1.5770  |
| H65 | 1.2920  | 2.3430  | 0.1500  |

|      |         |         |         |
|------|---------|---------|---------|
| H66  | -0.7950 | 1.3960  | -1.3020 |
| H67  | -1.6320 | 1.3130  | 0.2510  |
| H68  | 0.8980  | 0.4870  | 1.8010  |
| H69  | -0.7270 | -0.2730 | 1.9440  |
| H70  | 1.9030  | -1.7670 | 1.1370  |
| H71  | 0.3100  | -2.5240 | 1.4520  |
| H72  | 1.3260  | -2.8290 | 3.5550  |
| H73  | 0.3430  | -1.4070 | 3.7660  |
| H74  | 3.1240  | 3.3080  | 4.3640  |
| H75  | 3.6990  | 1.7160  | 4.8340  |
| H76  | 2.8040  | 2.7220  | 6.0550  |
| H77  | 4.2550  | -0.7680 | 1.1060  |
| H78  | 5.9560  | -1.4230 | 1.1190  |
| H79  | 5.5740  | 0.2930  | 0.6590  |
| H80  | 5.9910  | 2.2440  | 4.8090  |
| H81  | 5.5620  | 3.9220  | 4.5040  |
| H82  | 7.2980  | 3.4480  | 4.4990  |
| H83  | 2.9980  | 3.7410  | -0.1420 |
| H84  | 4.6770  | 3.3090  | 0.0590  |
| H85  | 3.7270  | 3.6900  | 2.1460  |
| H86  | 4.7660  | 0.6430  | 2.8940  |
| H87  | -0.8870 | -1.0190 | -0.5940 |
| H88  | 1.7360  | 1.5830  | 3.5330  |
| H89  | 0.0120  | 3.3740  | -0.5250 |
| H90  | 4.2530  | 5.0070  | -0.4600 |
| H91  | 0.3050  | 0.2790  | 4.9430  |
| H92  | -1.1280 | -0.7610 | -1.6280 |
| H93  | -1.8180 | -1.1060 | -0.0320 |
| H94  | -0.3940 | -1.9910 | -0.6140 |
| H95  | 0.8940  | -0.0230 | -0.5020 |
| C196 | 3.1700  | 1.6250  | 1.9400  |

S4 - Cartesian Coordinates for the  $[\text{L1H}_4\text{Br}]^{3+}$  lowest energy conformer

|     | x      | y       | z       |
|-----|--------|---------|---------|
| N1  | 5.7890 | 0.8480  | 3.3420  |
| C2  | 7.1500 | 1.3290  | 3.5750  |
| C3  | 7.5280 | 2.5930  | 2.7450  |
| N4  | 6.6840 | 3.7740  | 2.9080  |
| C5  | 7.0560 | 4.8380  | 1.9790  |
| C6  | 6.1410 | 6.0960  | 1.9580  |
| N7  | 4.7130 | 5.8210  | 1.7850  |
| C8  | 3.8860 | 6.9990  | 2.0620  |
| C9  | 3.7220 | 7.3400  | 3.5750  |
| N10 | 3.1030 | 6.3260  | 4.4310  |
| C11 | 3.1730 | 6.6920  | 5.8460  |
| C12 | 2.8410 | 5.5690  | 6.8720  |
| N13 | 3.7570 | 4.4260  | 6.8440  |
| C14 | 3.2200 | 3.2790  | 7.5820  |
| C15 | 3.9970 | 1.9470  | 7.3660  |
| N16 | 4.0330 | 1.4390  | 5.9950  |
| C17 | 5.0880 | 0.4440  | 5.8070  |
| C18 | 5.3400 | -0.1060 | 4.3680  |
| C19 | 5.6600 | 0.2420  | 2.0080  |
| C20 | 4.2600 | 0.4040  | 1.3650  |
| C21 | 4.1680 | 1.7210  | 0.5460  |
| N22 | 2.8610 | 2.1110  | 0.0390  |
| C23 | 2.8430 | 3.4260  | -0.5960 |
| C24 | 2.9900 | 4.6780  | 0.3150  |
| C25 | 4.4290 | 5.2230  | 0.4760  |
| C26 | 6.7170 | 4.2460  | 4.2720  |
| C27 | 1.7350 | 6.0680  | 4.0400  |
| C28 | 5.0750 | 4.8010  | 7.3380  |
| C29 | 2.7370 | 0.9230  | 5.6080  |
| C30 | 7.3170 | 1.5420  | 4.6540  |
| H31 | 7.8740 | 0.4970  | 3.3610  |
| H32 | 7.5430 | 2.3280  | 1.6660  |
| H33 | 8.5830 | 2.8730  | 2.9810  |
| H34 | 8.1020 | 5.1600  | 2.2070  |
| H35 | 6.4810 | 6.7950  | 1.1480  |
| H36 | 6.3150 | 6.6770  | 2.8910  |
| H37 | 4.3030 | 7.8780  | 1.5050  |
| H38 | 2.8740 | 6.8880  | 1.6110  |
| H49 | 3.1280 | 8.2810  | 3.6700  |
| H50 | 4.7240 | 7.5840  | 3.9880  |
| H51 | 4.1840 | 7.0900  | 6.0750  |
| H52 | 2.4910 | 7.5590  | 6.0210  |
| H53 | 1.7960 | 5.2230  | 6.6980  |
| H54 | 2.8100 | 5.9900  | 7.9120  |
| H55 | 3.1960 | 3.5270  | 8.6750  |
| H56 | 2.1430 | 3.1320  | 7.3230  |
| H57 | 3.5700 | 1.1590  | 8.0330  |
| H58 | 5.0330 | 2.0800  | 7.7450  |
| H59 | 6.0410 | 0.8660  | 6.1930  |
| H60 | 4.8590 | -0.4180 | 6.4800  |
| H61 | 6.0940 | -0.9340 | 4.4340  |
| H62 | 4.4210 | -0.6310 | 4.0150  |
| H63 | 6.3950 | 0.6560  | 1.2850  |
| H64 | 5.9510 | -0.8390 | 2.0530  |
| H65 | 3.4730 | 0.3680  | 2.1580  |



|      |        |         |         |
|------|--------|---------|---------|
| H66  | 4.8860 | 1.6830  | -0.3060 |
| H67  | 4.4980 | 2.5300  | 1.2280  |
| H68  | 3.5730 | 3.4460  | -1.4390 |
| H69  | 1.8450 | 3.5120  | -1.0870 |
| H70  | 2.5380 | 4.4660  | 1.3120  |
| H71  | 2.3600 | 5.5030  | -0.1080 |
| H72  | 4.6580 | 5.9510  | -0.3430 |
| H73  | 5.1140 | 4.3690  | 0.3080  |
| H74  | 6.0290 | 5.1070  | 4.3950  |
| H75  | 7.7420 | 4.5310  | 4.5990  |
| H76  | 6.3050 | 3.4590  | 4.9320  |
| H77  | 1.3410 | 5.1960  | 4.6030  |
| H78  | 1.6720 | 5.7550  | 2.9800  |
| H79  | 1.0730 | 6.9490  | 4.1970  |
| H80  | 5.5220 | 5.6250  | 6.7430  |
| H81  | 5.8060 | 3.9700  | 7.2540  |
| H82  | 5.0440 | 5.1250  | 8.4070  |
| H83  | 2.7370 | 0.6230  | 4.5410  |
| H84  | 1.9720 | 1.7240  | 5.6680  |
| H85  | 4.2720 | 2.2270  | 5.4040  |
| H86  | 3.6490 | 5.4780  | 4.3200  |
| H87  | 2.4080 | 1.1210  | -0.9590 |
| H88  | 5.7310 | 3.4980  | 2.6810  |
| H89  | 4.0840 | -0.4790 | 0.7000  |
| H90  | 2.4220 | 0.0570  | 6.2330  |
| H91  | 7.1150 | 4.4160  | 0.9520  |
| H92  | 2.3000 | 0.1390  | -0.5000 |
| H93  | 3.1140 | 1.0480  | -1.7870 |
| H94  | 1.4300 | 1.3980  | -1.3580 |
| H95  | 2.1900 | 2.1110  | 0.8130  |
| Br96 | 3.5900 | 3.3370  | 3.6150  |

S5 - Cartesian Coordinates (lowest energy conformer), atomic charges and atom types for the  $[\text{L1H}_5]^{5+}$ 

|     | x      | y       | z       | Atom type | Atomic charge |
|-----|--------|---------|---------|-----------|---------------|
| N1  | 5.4210 | 5.6650  | 2.8550  | N3        | -0.1216898    |
| C2  | 6.8560 | 5.3360  | 2.7840  | C4        | -0.09342241   |
| C3  | 7.6720 | 5.0890  | 4.0950  | C4        | -0.2384157    |
| N4  | 7.4340 | 3.8290  | 4.8030  | N3        | 0.6604352     |
| C5  | 6.0560 | 3.7710  | 5.2700  | C4        | -0.2772446    |
| C6  | 5.4380 | 2.4520  | 5.8210  | C4        | -0.08209562   |
| N7  | 3.9640 | 2.4490  | 5.7340  | N3        | -0.122262     |
| C8  | 3.3420 | 1.2290  | 6.2690  | C4        | -0.1083059    |
| C9  | 3.7140 | -0.1830 | 5.7050  | C4        | -0.2322025    |
| N10 | 3.0000 | -0.7140 | 4.5340  | N3        | 0.6610193     |
| C11 | 3.3340 | 0.0200  | 3.2890  | C4        | -0.2758989    |
| C12 | 2.6200 | -0.3680 | 1.9160  | C4        | -0.2227201    |
| N13 | 3.0630 | 0.2740  | 0.6510  | N3        | 0.5989084     |
| C14 | 2.9190 | 1.7450  | 0.6550  | C4        | -0.2314615    |
| C15 | 3.6200 | 2.6010  | -0.4990 | C4        | -0.263258     |
| N16 | 3.8350 | 4.0500  | -0.2550 | N3        | 0.638669      |
| C17 | 4.8290 | 4.2840  | 0.8030  | C4        | -0.2340288    |
| C18 | 4.7950 | 5.6680  | 1.5210  | C4        | -0.09098673   |
| C19 | 5.1820 | 6.8940  | 3.6260  | C4        | -0.08346033   |
| C20 | 3.7410 | 7.4670  | 3.7380  | C4        | -0.1279807    |
| C21 | 2.6610 | 6.5630  | 4.4020  | C4        | -0.2226081    |
| N22 | 2.4950 | 6.5890  | 5.8600  | N3        | 0.6310811     |
| C23 | 1.6130 | 5.5190  | 6.3450  | C4        | -0.2321215    |
| C24 | 1.9550 | 4.0350  | 5.9940  | C4        | -0.1128306    |
| C25 | 3.3940 | 3.6440  | 6.3860  | C4        | -0.09205294   |
| C26 | 8.3830 | 3.6030  | 5.8690  | C4        | -0.2643509    |
| C27 | 3.2200 | -2.1400 | 4.3940  | C4        | -0.2682991    |
| C28 | 2.4250 | -0.3120 | -0.5110 | C4        | -0.2543359    |
| C29 | 4.1690 | 4.7760  | -1.4640 | C4        | -0.2541728    |
| C30 | 2.0530 | 7.8790  | 6.3520  | C4        | -0.259542     |
| H31 | 6.9920 | 4.4020  | 2.1940  | H         | 0.04073244    |
| H32 | 7.3710 | 6.1400  | 2.1910  | H         | 0.1274478     |
| H33 | 7.6060 | 5.9540  | 4.7970  | H         | 0.1486242     |
| H34 | 8.7510 | 5.0810  | 3.7950  | H         | 0.1573641     |
| H35 | 5.9750 | 4.5790  | 6.0340  | H         | 0.1317404     |
| H36 | 5.7580 | 2.2690  | 6.8810  | H         | 0.1203215     |
| H37 | 5.8320 | 1.6140  | 5.2020  | H         | 0.04982603    |
| H38 | 3.5410 | 1.2180  | 7.3760  | H         | 0.1336564     |
| H39 | 2.2310 | 1.3310  | 6.2000  | H         | 0.09879076    |
| H40 | 3.4760 | -0.8840 | 6.5460  | H         | 0.1672165     |
| H41 | 4.8150 | -0.3100 | 5.5800  | H         | 0.1323267     |
| H42 | 3.1060 | 1.0820  | 3.5350  | H         | 0.1159651     |
| H43 | 4.4420 | -0.0640 | 3.1530  | H         | 0.1343547     |
| H44 | 1.5110 | -0.2390 | 2.0090  | H         | 0.1343604     |
| H45 | 2.7670 | -1.4630 | 1.7320  | H         | 0.1739063     |
| H46 | 1.8200 | 1.9700  | 0.6810  | H         | 0.1856284     |
| H47 | 3.3080 | 2.0790  | 1.6370  | H         | 0.1397849     |
| H48 | 2.9940 | 2.5270  | -1.4280 | H         | 0.1915308     |
| H49 | 4.6100 | 2.1640  | -0.7930 | H         | 0.1644456     |
| H50 | 4.6930 | 3.5430  | 1.6180  | H         | 0.03886974    |
| H51 | 5.8420 | 4.1000  | 0.3680  | H         | 0.1365385     |
| H52 | 5.2530 | 6.4820  | 0.8990  | H         | 0.1192607     |
| H53 | 3.7190 | 5.9280  | 1.6410  | H         | 0.08281481    |
| H54 | 5.5210 | 6.7270  | 4.6730  | H         | 0.05262637    |
| H55 | 5.8340 | 7.7080  | 3.2110  | H         | 0.1108472     |

|     |        |         |         |    |            |
|-----|--------|---------|---------|----|------------|
| H56 | 3.4010 | 7.7810  | 2.7190  | H  | 0.1083821  |
| H57 | 2.9040 | 5.5300  | 4.0770  | H  | 0.07147163 |
| H58 | 1.6640 | 6.8110  | 3.9590  | H  | 0.1295434  |
| H59 | 1.5880 | 5.5900  | 7.4610  | H  | 0.1480781  |
| H60 | 0.5650 | 5.7380  | 6.0180  | H  | 0.1449576  |
| H61 | 1.7860 | 3.8380  | 4.9090  | H  | 0.04879284 |
| H62 | 1.2240 | 3.3720  | 6.5290  | H  | 0.1226686  |
| H63 | 3.4970 | 3.5780  | 7.5000  | H  | 0.1110622  |
| H64 | 3.9650 | 4.5420  | 6.0930  | H  | 0.03514504 |
| H65 | 8.3480 | 4.3950  | 6.6540  | H  | 0.1496519  |
| H66 | 9.4240 | 3.5680  | 5.4710  | H  | 0.1211986  |
| H67 | 8.2130 | 2.6160  | 6.3550  | H  | 0.1404946  |
| H68 | 2.5580 | -2.5840 | 3.6190  | H  | 0.1192795  |
| H69 | 2.9320 | -2.6920 | 5.3220  | H  | 0.1631981  |
| H70 | 4.2820 | -2.3970 | 4.1700  | H  | 0.1366228  |
| H71 | 2.8400 | 0.1050  | -1.4560 | H  | 0.1127326  |
| H72 | 1.3190 | -0.1680 | -0.5170 | H  | 0.1171713  |
| H73 | 2.6220 | -1.4090 | -0.5840 | H  | 0.1662672  |
| H74 | 4.2810 | 5.8660  | -1.2590 | H  | 0.1328732  |
| H75 | 3.3560 | 4.7090  | -2.2250 | H  | 0.1570941  |
| H76 | 1.9670 | 7.8790  | 7.4640  | H  | 0.1264144  |
| H77 | 1.0620 | 8.1810  | 5.9370  | H  | 0.1455399  |
| H78 | 2.7840 | 8.6850  | 6.1280  | H  | 0.1382546  |
| H79 | 2.9440 | 4.4280  | 0.0820  | HB | 0.06665945 |
| H80 | 1.9990 | -0.5820 | 4.7090  | HB | 0.07001472 |
| H81 | 3.4180 | 6.4180  | 6.2660  | HB | 0.04800367 |
| H82 | 7.5570 | 3.0750  | 4.1220  | HB | 0.03589618 |
| H83 | 4.0650 | 0.0790  | 0.5660  | HB | 0.04005408 |
| H84 | 3.8040 | 8.4680  | 4.2380  | H  | 0.128407   |
| H85 | 5.1140 | 4.4200  | -1.9390 | H  | 0.1417254  |
| H86 | 5.4200 | 4.0160  | 4.3960  | H  | 0.1089978  |

S6 - Cartesian Coordinates for the  $[\text{L1H}_5\text{F}]^{4+}$  lowest energy conformer

|     | x       | y       | z       |
|-----|---------|---------|---------|
| N1  | 3.1270  | 0.9150  | 3.0010  |
| C2  | 3.5240  | 0.2640  | 4.2570  |
| C3  | 5.0120  | -0.1110 | 4.5250  |
| N4  | 5.9290  | 0.9800  | 4.8470  |
| C5  | 6.0460  | 1.9110  | 3.7390  |
| C6  | 6.8600  | 3.2140  | 3.9460  |
| N7  | 6.4590  | 4.2470  | 2.9890  |
| C8  | 6.9960  | 5.5720  | 3.2970  |
| C9  | 6.4380  | 6.2050  | 4.6050  |
| N10 | 4.9820  | 6.1970  | 4.7470  |
| C11 | 4.5610  | 6.6800  | 6.0800  |
| C12 | 3.0270  | 6.6440  | 6.4520  |
| N13 | 2.4520  | 5.3010  | 6.6260  |
| C14 | 1.0710  | 5.1430  | 6.1450  |
| C15 | 0.6720  | 3.7040  | 5.6180  |
| N16 | 1.3120  | 3.2040  | 4.3800  |
| C17 | 0.9600  | 1.8040  | 4.1270  |
| C18 | 1.6670  | 1.0780  | 2.9420  |
| C19 | 3.6390  | 0.2030  | 1.8200  |
| C20 | 3.2880  | 0.7490  | 0.4080  |
| C21 | 3.8080  | 2.1800  | 0.0800  |
| N22 | 5.0830  | 2.3310  | -0.6300 |
| C23 | 5.5310  | 3.7240  | -0.7110 |
| C24 | 5.7120  | 4.5200  | 0.6120  |
| C25 | 6.7010  | 3.8630  | 1.5960  |
| C26 | 7.2210  | 0.4860  | 5.2720  |
| C27 | 4.3550  | 6.9540  | 3.6840  |
| C28 | 2.5940  | 4.8430  | 7.9950  |
| C29 | 0.9820  | 4.0210  | 3.2290  |
| C30 | 5.0550  | 1.7390  | -1.9540 |
| H31 | 3.2490  | 0.9410  | 5.0980  |
| H32 | 2.9070  | -0.6670 | 4.3780  |
| H33 | 5.4340  | -0.7560 | 3.7190  |
| H34 | 5.0020  | -0.7840 | 5.4180  |
| H35 | 6.4560  | 1.3330  | 2.8810  |
| H36 | 7.9660  | 3.0480  | 3.8760  |
| H37 | 6.6370  | 3.5710  | 4.9780  |
| H38 | 8.1160  | 5.5180  | 3.3440  |
| H39 | 6.8120  | 6.2690  | 2.4450  |
| H40 | 6.8070  | 7.2580  | 4.6870  |
| H41 | 6.8890  | 5.6810  | 5.4770  |
| H42 | 5.1150  | 6.0900  | 6.8480  |
| H43 | 4.9270  | 7.7320  | 6.1940  |
| H44 | 2.4650  | 7.2110  | 5.6780  |
| H45 | 2.8240  | 7.2480  | 7.3730  |
| H46 | 0.3710  | 5.4990  | 6.9450  |
| H47 | 0.8860  | 5.8650  | 5.3190  |
| H48 | -0.4370 | 3.6620  | 5.4620  |
| H49 | 0.8680  | 2.9590  | 6.4240  |
| H50 | 1.1220  | 1.2060  | 5.0510  |
| H51 | -0.1450 | 1.7410  | 3.9580  |
| H52 | 1.1990  | 0.0640  | 2.8330  |
| H53 | 1.3880  | 1.6060  | 2.0040  |
| H54 | 4.7490  | 0.1860  | 1.8540  |
| H55 | 3.3060  | -0.8660 | 1.8740  |
| H56 | 2.1810  | 0.6990  | 0.2570  |

|     |         |         |         |
|-----|---------|---------|---------|
| H57 | 3.8720  | 2.7000  | 1.0600  |
| H58 | 3.0320  | 2.7220  | -0.5140 |
| H59 | 6.5220  | 3.7380  | -1.2280 |
| H60 | 4.8360  | 4.2910  | -1.3800 |
| H61 | 4.7260  | 4.6720  | 1.1110  |
| H62 | 6.0680  | 5.5550  | 0.3670  |
| H63 | 7.7660  | 4.0590  | 1.3070  |
| H64 | 6.5660  | 2.7730  | 1.4630  |
| H65 | 7.8780  | 1.3200  | 5.6040  |
| H66 | 7.7440  | -0.0800 | 4.4670  |
| H67 | 7.1220  | -0.1830 | 6.1590  |
| H68 | 4.6030  | 8.0390  | 3.7300  |
| H69 | 3.2570  | 6.8110  | 3.7200  |
| H70 | 4.6360  | 6.5430  | 2.6950  |
| H71 | 3.6600  | 4.8820  | 8.3110  |
| H72 | 2.2730  | 3.7830  | 8.0940  |
| H73 | 1.9990  | 5.4540  | 8.7160  |
| H74 | -0.0980 | 3.9700  | 2.9610  |
| H75 | 1.6130  | 3.7240  | 2.3690  |
| H76 | 4.8810  | 0.6430  | -1.9180 |
| H77 | 6.0390  | 1.8490  | -2.4680 |
| H78 | 4.2760  | 2.1990  | -2.6070 |
| H79 | 2.3210  | 3.2130  | 4.5180  |
| H80 | 4.7090  | 5.2210  | 4.6600  |
| H81 | 5.7870  | 1.8220  | -0.0890 |
| H82 | 5.5240  | 1.4920  | 5.6330  |
| H83 | 3.0330  | 4.6600  | 6.0950  |
| H84 | 3.6250  | -0.0080 | -0.3420 |
| H85 | 1.2690  | 5.0780  | 3.3980  |
| H86 | 5.0160  | 2.2600  | 3.4980  |
| F86 | 3.2600  | 4.5460  | 4.5160  |

S7 - Cartesian Coordinates (lowest energy conformer), atomic charges and atom types for the  $[L_2H_4]^{4+}$ 

|     | x       | y       | z       | Atomic charge | Atom type |
|-----|---------|---------|---------|---------------|-----------|
| N1  | 3.5240  | -1.4650 | 1.0300  | 0.7259588     | N3        |
| C2  | 4.6770  | -0.7110 | 1.5710  | -0.2980494    | C4        |
| C3  | 4.8940  | 0.8530  | 1.3740  | -0.2766681    | C4        |
| N4  | 4.0710  | 1.8350  | 2.1010  | 0.7075005     | N3        |
| C5  | 4.1540  | 3.1480  | 1.5030  | -0.3181839    | C4        |
| C6  | 4.4000  | 1.8900  | 3.5400  | -0.2643037    | C4        |
| C7  | 3.3660  | 2.4960  | 4.5880  | -0.2895546    | C4        |
| N8  | 2.3370  | 1.6070  | 5.1520  | 0.727057      | N3        |
| C9  | 1.6200  | 0.9160  | 4.0870  | -0.2894888    | C4        |
| C10 | 0.7870  | 1.7600  | 3.0920  | -0.1259804    | C4        |
| C11 | 0.3990  | 0.9740  | 1.8230  | 0.07917881    | C4        |
| O12 | 1.5920  | 0.6560  | 1.1130  | -0.3882146    | O2        |
| C13 | 1.3050  | 0.2410  | -0.2150 | 0.05549169    | C4        |
| C14 | 2.6310  | -0.0490 | -0.9350 | -0.1264687    | C4        |
| C15 | 3.3620  | -1.3140 | -0.4130 | -0.2939849    | C4        |
| C16 | 3.6080  | -2.8820 | 1.3970  | -0.2780766    | C4        |
| C17 | 3.5510  | -3.3040 | 2.8970  | -0.1111536    | C4        |
| N18 | 2.3670  | -2.8940 | 3.6610  | -0.08677816   | N3        |
| C19 | 1.1320  | -3.3170 | 3.0210  | -0.1245866    | C4        |
| C20 | 2.4530  | -3.3710 | 5.0490  | -0.07618618   | C4        |
| C21 | 1.2800  | -2.9530 | 5.9750  | -0.2933164    | C4        |
| N22 | 1.5680  | -2.9520 | 7.4060  | 0.7603545     | N3        |
| C23 | 1.8640  | -4.2730 | 7.9070  | -0.3177056    | C4        |
| C24 | 0.5340  | -2.3030 | 8.2000  | -0.2909327    | C4        |
| C25 | 0.0330  | -0.8990 | 7.7530  | -0.0898633    | C4        |
| N26 | 1.0680  | 0.0460  | 7.3300  | -0.1561999    | N3        |
| C27 | 2.0460  | 0.2850  | 8.3790  | -0.1242929    | C4        |
| C28 | 0.4710  | 1.2950  | 6.8470  | -0.09147644   | C4        |
| C29 | 1.4730  | 2.2440  | 6.1300  | -0.2831178    | C4        |
| H30 | 2.6780  | -1.0980 | 1.4700  | 0.03790569    | HB        |
| H31 | 2.4160  | -2.3940 | 7.5280  | 0.01884282    | HB        |
| H32 | 2.8460  | 0.8790  | 5.6650  | 0.04854214    | HB        |
| H33 | 4.7500  | -0.9700 | 2.6490  | 0.1839141     | H         |
| H34 | 5.5820  | -1.2100 | 1.1320  | 0.1608645     | H         |
| H35 | 5.9630  | 1.0890  | 1.6170  | 0.1234637     | H         |
| H36 | 4.8750  | 1.0980  | 0.2860  | 0.1861262     | H         |
| H37 | 3.5290  | 3.8910  | 2.0450  | 0.1340538     | H         |
| H38 | 3.7570  | 3.1360  | 0.4610  | 0.1410244     | H         |
| H39 | 5.1980  | 3.5410  | 1.4640  | 0.1640172     | H         |
| H40 | 5.3750  | 2.4450  | 3.6190  | 0.1864678     | H         |
| H41 | 4.6660  | 0.8680  | 3.8950  | 0.1083565     | H         |
| H42 | 3.9560  | 2.8510  | 5.4740  | 0.1744226     | H         |
| H43 | 2.8820  | 3.4350  | 4.2220  | 0.1662953     | H         |
| H44 | 0.9490  | 0.1590  | 4.5520  | 0.1385145     | H         |
| H45 | 2.3510  | 0.2910  | 3.5310  | 0.05984437    | H         |
| H46 | 1.3150  | 2.6810  | 2.7510  | 0.07391131    | H         |
| H47 | -0.1640 | 2.1220  | 3.5660  | 0.1258847     | H         |
| H48 | -0.1290 | 0.0240  | 2.0790  | 0.06230313    | H         |
| H49 | -0.2810 | 1.6010  | 1.1880  | 0.1140401     | H         |
| H50 | 0.7590  | 1.0590  | -0.7560 | 0.107258      | H         |
| H51 | 0.6530  | -0.6670 | -0.1940 | 0.06883222    | H         |
| H52 | 3.2580  | 0.8690  | -0.9360 | 0.07861942    | H         |
| H53 | 2.3980  | -0.1810 | -2.0300 | 0.1549342     | H         |

|     |         |         |         |            |    |
|-----|---------|---------|---------|------------|----|
| H54 | 2.7290  | -2.1510 | -0.7950 | 0.1476875  | H  |
| H55 | 4.3400  | -1.4660 | -0.9340 | 0.1559653  | H  |
| H56 | 2.7960  | -3.4480 | 0.8820  | 0.1579423  | H  |
| H57 | 4.5380  | -3.3120 | 0.9480  | 0.08765632 | H  |
| H58 | 3.6140  | -4.4260 | 2.9260  | 0.1205376  | H  |
| H59 | 4.4790  | -2.9970 | 3.4390  | 0.1163832  | H  |
| H60 | 1.0810  | -4.4270 | 2.9080  | 0.08962464 | H  |
| H61 | 1.0050  | -2.8440 | 2.0230  | 0.0657931  | H  |
| H62 | 0.2340  | -2.9900 | 3.5900  | 0.08481431 | H  |
| H63 | 3.3830  | -2.9440 | 5.4930  | 0.01151711 | H  |
| H64 | 2.5610  | -4.4870 | 5.0500  | 0.09286726 | H  |
| H65 | 1.0140  | -1.9170 | 5.6820  | 0.1006021  | H  |
| H66 | 0.3830  | -3.5970 | 5.8080  | 0.159485   | H  |
| H67 | 2.1250  | -4.2410 | 8.9910  | 0.1528939  | H  |
| H68 | 2.7530  | -4.7060 | 7.4000  | 0.1447133  | H  |
| H69 | 1.0050  | -4.9730 | 7.7800  | 0.113968   | H  |
| H70 | -0.3490 | -2.9860 | 8.2670  | 0.1601272  | H  |
| H71 | 0.9080  | -2.2310 | 9.2500  | 0.1536906  | H  |
| H72 | -0.7080 | -1.0360 | 6.9270  | 0.08446968 | H  |
| H73 | -0.5720 | -0.4470 | 8.5860  | 0.1307657  | H  |
| H74 | 2.8690  | 0.9460  | 8.0300  | 0.04530966 | H  |
| H75 | 2.5490  | -0.6560 | 8.6930  | 0.054793   | H  |
| H76 | 1.5850  | 0.7460  | 9.2890  | 0.110348   | H  |
| H77 | -0.0230 | 1.8310  | 7.7040  | 0.1379838  | H  |
| H78 | -0.3800 | 1.0720  | 6.1580  | 0.0925715  | H  |
| H79 | 0.9060  | 3.0810  | 5.6540  | 0.1555846  | H  |
| H80 | 2.1020  | 2.7380  | 6.9100  | 0.1510302  | H  |
| H81 | 3.1010  | 1.5280  | 2.0240  | 0.0414778  | HB |

S8 - Cartesian Coordinates for the [L2H<sub>4</sub>F]<sup>3+</sup> lowest energy conformer

|     | x       | y       | z       |
|-----|---------|---------|---------|
| N1  | 3.9170  | -2.2430 | 4.9260  |
| C2  | 5.0810  | -2.7320 | 4.1490  |
| C3  | 5.3170  | -2.0170 | 2.7650  |
| N4  | 4.2130  | -2.2140 | 1.8210  |
| C5  | 4.3150  | -3.5140 | 1.1860  |
| C6  | 4.0440  | -1.1640 | 0.8120  |
| C7  | 2.5660  | -1.0590 | 0.2830  |
| N8  | 1.5350  | -0.7250 | 1.2950  |
| C9  | 0.2450  | -1.2670 | 0.8900  |
| C10 | 0.1030  | -2.8080 | 1.0380  |
| C11 | 0.0390  | -3.3320 | 2.4880  |
| O12 | 1.3320  | -3.4740 | 3.0750  |
| C13 | 1.2230  | -3.9910 | 4.3980  |
| C14 | 2.5890  | -4.4200 | 4.9770  |
| C15 | 3.3730  | -3.3160 | 5.7480  |
| C16 | 4.2800  | -1.0610 | 5.7130  |
| C17 | 3.1240  | -0.2660 | 6.3850  |
| N18 | 3.5160  | 1.0310  | 6.9470  |
| C19 | 4.6920  | 0.9350  | 7.8000  |
| C20 | 2.4260  | 1.6770  | 7.6760  |
| C21 | 1.3150  | 2.2890  | 6.7940  |
| N22 | 1.6810  | 3.4020  | 5.9250  |
| C23 | 2.3560  | 4.4630  | 6.6360  |
| C24 | 0.5230  | 3.9260  | 5.2080  |
| C25 | -0.1200 | 2.9520  | 4.1900  |
| N26 | 0.8570  | 2.5000  | 3.2040  |
| C27 | 1.1290  | 3.5260  | 2.2070  |
| C28 | 0.4790  | 1.2220  | 2.6070  |
| C29 | 1.4830  | 0.7170  | 1.5370  |
| H30 | 3.1690  | -2.0070 | 4.2870  |
| H31 | 2.3340  | 3.0420  | 5.2250  |
| H32 | 1.7590  | -1.2020 | 2.1640  |
| H33 | 5.9940  | -2.6480 | 4.7900  |
| H34 | 4.9960  | -3.8290 | 3.9940  |
| H35 | 5.4010  | -0.9250 | 2.9710  |
| H36 | 6.2860  | -2.2880 | 2.2750  |
| H37 | 5.2250  | -3.6030 | 0.5490  |
| H38 | 3.4210  | -3.7230 | 0.5630  |
| H39 | 4.3320  | -4.3250 | 1.9430  |
| H40 | 4.8030  | -1.2950 | 0.0020  |
| H41 | 4.2960  | -0.1830 | 1.2760  |
| H42 | 2.5030  | -0.3120 | -0.5460 |
| H43 | 2.2870  | -2.0030 | -0.2300 |
| H44 | 0.0060  | -0.9300 | -0.1480 |
| H45 | -0.5550 | -0.8410 | 1.5340  |
| H46 | 0.8650  | -3.3980 | 0.4790  |
| H47 | -0.8670 | -3.0970 | 0.5520  |
| H48 | -0.5790 | -2.6500 | 3.1200  |
| H49 | -0.4490 | -4.3400 | 2.4710  |
| H50 | 0.5610  | -4.8950 | 4.3730  |
| H51 | 0.7350  | -3.2230 | 5.0450  |
| H52 | 3.1720  | -4.9200 | 4.1690  |
| H53 | 2.3820  | -5.2540 | 5.7020  |
| H54 | 2.6480  | -2.8790 | 6.4680  |



|     |         |         |        |
|-----|---------|---------|--------|
| H55 | 4.1890  | -3.7550 | 6.3720 |
| H56 | 5.0340  | -1.3680 | 6.4740 |
| H57 | 4.7670  | -0.3380 | 5.0180 |
| H58 | 2.3510  | -0.0880 | 5.5970 |
| H59 | 2.6510  | -0.8670 | 7.1980 |
| H60 | 4.9640  | 1.9280  | 8.2270 |
| H61 | 5.5930  | 0.6450  | 7.2170 |
| H62 | 4.5390  | 0.2250  | 8.6460 |
| H63 | 2.8210  | 2.4870  | 8.3300 |
| H64 | 1.9900  | 0.9560  | 8.4140 |
| H65 | 0.8860  | 1.4760  | 6.1730 |
| H66 | 0.4990  | 2.6320  | 7.4750 |
| H67 | 1.7470  | 4.8510  | 7.4840 |
| H68 | 2.6070  | 5.3080  | 5.9560 |
| H69 | 3.3400  | 4.1120  | 7.0150 |
| H70 | -0.2440 | 4.2720  | 5.9430 |
| H71 | 0.8230  | 4.8520  | 4.6690 |
| H72 | -0.5790 | 2.0870  | 4.7250 |
| H73 | -0.9910 | 3.4320  | 3.6700 |
| H74 | 2.0010  | 3.2530  | 1.5730 |
| H75 | 1.4240  | 4.4920  | 2.6690 |
| H76 | 0.2490  | 3.7150  | 1.5460 |
| H77 | -0.5560 | 1.3100  | 2.1850 |
| H78 | 0.4550  | 0.4650  | 3.4300 |
| H79 | 1.3060  | 1.2520  | 0.5770 |
| H80 | 2.4970  | 0.9820  | 1.9140 |
| H81 | 3.3520  | -2.2570 | 2.3650 |
| F82 | 2.9880  | -0.8690 | 3.1860 |

S9 - Cartesian Coordinates for the  $[L2H_4F(H_2O)]^{3+}$  lowest energy conformer

|     | x       | y       | z       |
|-----|---------|---------|---------|
| N1  | 4.9070  | -0.1340 | 4.7980  |
| C2  | 5.6720  | -1.3850 | 5.0110  |
| C3  | 4.9520  | -2.7040 | 4.5370  |
| N4  | 3.7060  | -2.9690 | 5.2620  |
| C5  | 3.9910  | -3.5530 | 6.5590  |
| C6  | 2.7110  | -3.7740 | 4.5460  |
| C7  | 1.2390  | -3.5080 | 5.0340  |
| N8  | 0.7390  | -2.1210 | 4.8730  |
| C9  | -0.2720 | -1.8330 | 5.8820  |
| C10 | 0.2650  | -1.6380 | 7.3270  |
| C11 | 1.0760  | -0.3470 | 7.5610  |
| O12 | 2.4330  | -0.4740 | 7.1410  |
| C13 | 3.1490  | 0.7280  | 7.4100  |
| C14 | 4.6740  | 0.5510  | 7.2470  |
| C15 | 5.2390  | 0.8440  | 5.8260  |
| C16 | 5.1280  | 0.3840  | 3.4450  |
| C17 | 4.1940  | 1.5310  | 2.9620  |
| N18 | 4.2910  | 1.8380  | 1.5320  |
| C19 | 5.6660  | 2.0200  | 1.0920  |
| C20 | 3.4890  | 3.0000  | 1.1500  |
| C21 | 1.9620  | 2.7680  | 1.1170  |
| N22 | 1.4470  | 1.7980  | 0.1560  |
| C23 | 1.9390  | 2.0270  | -1.1830 |
| C24 | -0.0110 | 1.7570  | 0.1650  |
| C25 | -0.6440 | 1.2090  | 1.4670  |
| N26 | -0.1640 | -0.1390 | 1.7560  |
| C27 | -0.8090 | -1.1350 | 0.9120  |
| C28 | -0.2520 | -0.4630 | 3.1770  |
| C29 | 0.2420  | -1.8940 | 3.5170  |
| H30 | 3.9200  | -0.3250 | 4.9280  |
| H31 | 1.7730  | 0.8780  | 0.4480  |
| H32 | 1.5000  | -1.4730 | 5.0600  |
| H33 | 6.6660  | -1.2820 | 4.5080  |
| H34 | 5.9560  | -1.4770 | 6.0810  |
| H35 | 4.7010  | -2.5710 | 3.4590  |
| H36 | 5.6070  | -3.6110 | 4.5680  |
| H37 | 4.6660  | -2.9010 | 7.1510  |
| H38 | 4.4570  | -4.5620 | 6.4750  |
| H39 | 3.0680  | -3.6360 | 7.1680  |
| H40 | 3.0050  | -4.8530 | 4.5770  |
| H41 | 2.7500  | -3.5060 | 3.4650  |
| H42 | 0.5280  | -4.2010 | 4.5210  |
| H43 | 1.1370  | -3.8160 | 6.0960  |
| H44 | -1.0690 | -2.6150 | 5.8450  |
| H45 | -0.7810 | -0.8760 | 5.6320  |
| H46 | 0.8440  | -2.5020 | 7.7260  |
| H47 | -0.6280 | -1.5800 | 8.0050  |
| H48 | 0.6030  | 0.5120  | 7.0270  |
| H49 | 1.0680  | -0.1280 | 8.6600  |
| H50 | 2.9490  | 1.0320  | 8.4700  |
| H51 | 2.7620  | 1.5340  | 6.7410  |
| H52 | 4.9600  | -0.4440 | 7.6620  |
| H53 | 5.1570  | 1.2760  | 7.9570  |
| H54 | 4.8180  | 1.8280  | 5.5300  |
| H55 | 6.3470  | 0.9890  | 5.8530  |
| H56 | 6.1950  | 0.6920  | 3.3600  |

|     |         |         |         |
|-----|---------|---------|---------|
| H57 | 4.9580  | -0.4570 | 2.7360  |
| H58 | 3.1450  | 1.2130  | 3.1790  |
| H59 | 4.3900  | 2.4720  | 3.5310  |
| H60 | 5.7130  | 2.2650  | 0.0050  |
| H61 | 6.2450  | 1.0740  | 1.1730  |
| H62 | 6.1820  | 2.8350  | 1.6520  |
| H63 | 3.7940  | 3.3680  | 0.1440  |
| H64 | 3.7410  | 3.8630  | 1.8180  |
| H65 | 1.6360  | 2.4680  | 2.1340  |
| H66 | 1.4820  | 3.7540  | 0.9080  |
| H67 | 3.0370  | 1.8600  | -1.2170 |
| H68 | 1.7010  | 3.0520  | -1.5460 |
| H69 | 1.5240  | 1.2790  | -1.8950 |
| H70 | -0.4150 | 2.7720  | -0.0660 |
| H71 | -0.3540 | 1.1260  | -0.6850 |
| H72 | -0.4320 | 1.9010  | 2.3170  |
| H73 | -1.7640 | 1.2070  | 1.4000  |
| H74 | -0.3110 | -2.1250 | 1.0010  |
| H75 | -0.7220 | -0.8880 | -0.1680 |
| H76 | -1.8930 | -1.2530 | 1.1530  |
| H77 | -1.3060 | -0.2990 | 3.5210  |
| H78 | 0.4070  | 0.2590  | 3.7210  |
| H79 | -0.5590 | -2.6310 | 3.2810  |
| H80 | 1.1130  | -2.0910 | 2.8540  |
| H81 | 3.2770  | -2.0670 | 5.4690  |
| F82 | 2.8370  | -1.2030 | 4.1210  |
| O83 | 2.7870  | -0.7790 | 0.6110  |
| H84 | 2.8880  | -1.0880 | 1.5380  |
| H85 | 3.1620  | -1.5100 | 0.0710  |

S10 - Cartesian Coordinates for the  $[\text{L2H}_4\text{Cl}]^{3+}$  lowest energy conformer

|     | x       | y       | z       |
|-----|---------|---------|---------|
| N1  | 1.0870  | 1.8940  | 2.7830  |
| C2  | -0.3220 | 1.4450  | 2.7040  |
| C3  | -0.6830 | -0.0610 | 3.0830  |
| N4  | 0.0300  | -1.1540 | 2.4120  |
| C5  | -0.4250 | -1.2710 | 1.0400  |
| C6  | -0.0080 | -2.4620 | 3.0810  |
| C7  | 1.1570  | -3.4680 | 2.6950  |
| N8  | 2.5300  | -3.1770 | 3.1720  |
| C9  | 3.5370  | -3.8420 | 2.3520  |
| C10 | 3.7240  | -3.3430 | 0.8920  |
| C11 | 4.3870  | -1.9620 | 0.7260  |
| O12 | 3.5220  | -0.9320 | 1.1790  |
| C13 | 4.0290  | 0.3610  | 0.8510  |
| C14 | 3.3710  | 1.4250  | 1.7560  |
| C15 | 1.8300  | 1.4920  | 1.5920  |
| C16 | 1.1920  | 3.3280  | 3.0190  |
| C17 | 1.1580  | 3.6850  | 4.5280  |
| N18 | 2.4150  | 3.2220  | 5.1030  |
| C19 | 3.3670  | 4.3000  | 5.2990  |
| C20 | 2.2930  | 2.3260  | 6.2420  |
| C21 | 3.6080  | 1.5360  | 6.4650  |
| N22 | 3.4640  | 0.1670  | 6.9510  |
| C23 | 2.8560  | 0.1390  | 8.2600  |
| C24 | 4.7470  | -0.5280 | 6.9310  |
| C25 | 4.7410  | -2.0120 | 7.3740  |
| N26 | 3.7060  | -2.7940 | 6.7100  |
| C27 | 3.4420  | -4.0240 | 7.4420  |
| C28 | 3.9640  | -3.0520 | 5.2950  |
| C29 | 2.6760  | -3.5460 | 4.5810  |
| H30 | 1.5120  | 1.4420  | 3.5890  |
| H31 | 2.8380  | -0.3280 | 6.3180  |
| H32 | 2.6940  | -2.1760 | 3.0780  |
| H33 | -0.8840 | 2.0760  | 3.4360  |
| H34 | -0.7480 | 1.7620  | 1.7200  |
| H35 | -0.4820 | -0.1520 | 4.1780  |
| H36 | -1.7840 | -0.2510 | 3.0030  |
| H37 | -0.4200 | -0.2920 | 0.5150  |
| H38 | -1.4660 | -1.6660 | 0.9780  |
| H39 | 0.2420  | -1.9380 | 0.4530  |
| H40 | -1.0200 | -2.9170 | 2.9270  |
| H41 | 0.0330  | -2.2970 | 4.1820  |
| H42 | 0.8980  | -4.5000 | 3.0450  |
| H43 | 1.1870  | -3.5960 | 1.5930  |
| H44 | 3.3440  | -4.9430 | 2.3580  |
| H45 | 4.5310  | -3.7090 | 2.8360  |
| H46 | 2.7920  | -3.3660 | 0.2810  |
| H47 | 4.4010  | -4.0710 | 0.3690  |
| H48 | 5.3330  | -1.9190 | 1.3180  |
| H49 | 4.6320  | -1.7870 | -0.3540 |
| H50 | 3.8220  | 0.5640  | -0.2290 |
| H51 | 5.1360  | 0.3880  | 1.0110  |
| H52 | 3.8390  | 2.4180  | 1.5390  |
| H53 | 3.6750  | 1.1660  | 2.8020  |
| H54 | 1.5420  | 2.1190  | 0.7140  |
| H55 | 1.5560  | 0.4550  | 1.3430  |

|      |        |         |        |
|------|--------|---------|--------|
| H56  | 2.1690 | 3.6960  | 2.6290 |
| H57  | 0.4190 | 3.8870  | 2.4400 |
| H58  | 1.0410 | 4.7900  | 4.6780 |
| H59  | 0.2770 | 3.2550  | 5.0620 |
| H60  | 3.0460 | 4.9850  | 6.1200 |
| H61  | 3.4880 | 4.9000  | 4.3680 |
| H62  | 4.3820 | 3.9150  | 5.5460 |
| H63  | 1.4870 | 1.5900  | 6.0210 |
| H64  | 1.9760 | 2.9040  | 7.1470 |
| H65  | 4.0990 | 1.4610  | 5.4680 |
| H66  | 4.2930 | 2.1050  | 7.1370 |
| H67  | 1.8750 | 0.6580  | 8.2410 |
| H68  | 3.5050 | 0.6160  | 9.0290 |
| H69  | 2.6320 | -0.9080 | 8.5570 |
| H70  | 5.1480 | -0.4660 | 5.8950 |
| H71  | 5.4760 | 0.0300  | 7.5680 |
| H72  | 5.7410 | -2.4830 | 7.1930 |
| H73  | 4.6180 | -2.0730 | 8.4860 |
| H74  | 2.5920 | -4.5900 | 7.0020 |
| H75  | 3.1280 | -3.7990 | 8.4870 |
| H76  | 4.3350 | -4.6930 | 7.4820 |
| H77  | 4.8200 | -3.7690 | 5.1920 |
| H78  | 4.2920 | -2.1090 | 4.8040 |
| H79  | 2.5730 | -4.6500 | 4.7000 |
| H80  | 1.8310 | -3.0790 | 5.1320 |
| H81  | 1.0140 | -0.8860 | 2.3770 |
| C182 | 2.1280 | -0.4670 | 4.2100 |

S11 - Cartesian Coordinates for the  $[L2H_4Br]^{3+}$  lowest energy conformer

|     | x       | y       | z       |
|-----|---------|---------|---------|
| N1  | 2.6030  | -0.6960 | 6.8430  |
| C2  | 2.1070  | 0.6160  | 7.3340  |
| C3  | 1.2950  | 1.5340  | 6.3330  |
| N4  | 2.0360  | 2.1790  | 5.2420  |
| C5  | 2.8700  | 3.2470  | 5.7590  |
| C6  | 1.1870  | 2.7080  | 4.1620  |
| C7  | 1.9190  | 3.0430  | 2.8050  |
| N8  | 2.4120  | 1.8960  | 2.0190  |
| C9  | 3.5860  | 2.2520  | 1.2370  |
| C10 | 4.8900  | 2.4850  | 2.0500  |
| C11 | 5.3870  | 1.2590  | 2.8420  |
| O12 | 4.7870  | 1.2010  | 4.1310  |
| C13 | 5.1330  | -0.0050 | 4.8080  |
| C14 | 4.9900  | 0.1680  | 6.3360  |
| C15 | 4.0400  | -0.8400 | 7.0490  |
| C16 | 1.8340  | -1.7900 | 7.4420  |
| C17 | 2.2760  | -3.2580 | 7.1860  |
| N18 | 2.5580  | -3.5930 | 5.7970  |
| C19 | 3.2230  | -4.8860 | 5.7070  |
| C20 | 1.3900  | -3.5270 | 4.9260  |
| C21 | 1.7810  | -3.6280 | 3.4310  |
| N22 | 0.9320  | -2.9170 | 2.4830  |
| C23 | -0.4360 | -3.3720 | 2.5460  |
| C24 | 1.4760  | -3.0280 | 1.1330  |
| C25 | 0.7390  | -2.2400 | 0.0220  |
| N26 | 0.4720  | -0.8550 | 0.3900  |
| C27 | -0.5070 | -0.2680 | -0.5130 |
| C28 | 1.6680  | -0.0270 | 0.5070  |
| C29 | 1.3510  | 1.3300  | 1.1910  |
| H30 | 2.4450  | -0.7370 | 5.8410  |
| H31 | 0.9340  | -1.9300 | 2.7320  |
| H32 | 2.7200  | 1.1800  | 2.6750  |
| H33 | 1.4330  | 0.4310  | 8.2070  |
| H34 | 2.9290  | 1.1620  | 7.8500  |
| H35 | 0.5100  | 0.8810  | 5.8800  |
| H36 | 0.7170  | 2.3260  | 6.8730  |
| H37 | 2.2770  | 4.1290  | 6.0940  |
| H38 | 3.6110  | 3.5710  | 4.9980  |
| H39 | 3.4760  | 2.9230  | 6.6280  |
| H40 | 0.6180  | 3.5910  | 4.5490  |
| H41 | 0.3870  | 1.9620  | 3.9450  |
| H42 | 1.2540  | 3.6510  | 2.1410  |
| H43 | 2.7590  | 3.7470  | 2.9880  |
| H44 | 3.3550  | 3.1310  | 0.5860  |
| H45 | 3.8170  | 1.4160  | 0.5390  |
| H46 | 4.8560  | 3.3720  | 2.7250  |
| H47 | 5.6970  | 2.7490  | 1.3150  |
| H48 | 5.1660  | 0.3180  | 2.2810  |
| H49 | 6.4940  | 1.3430  | 2.9890  |
| H50 | 6.1880  | -0.2930 | 4.5670  |
| H51 | 4.4800  | -0.8200 | 4.4170  |
| H52 | 4.7620  | 1.2290  | 6.5690  |
| H53 | 6.0200  | 0.0520  | 6.7700  |
| H54 | 4.3330  | -1.8450 | 6.6670  |
| H55 | 4.2430  | -0.8600 | 8.1480  |
| H56 | 1.8260  | -1.6760 | 8.5530  |
| H57 | 0.7770  | -1.6690 | 7.1080  |

|      |         |         |         |
|------|---------|---------|---------|
| H58  | 3.1740  | -3.4910 | 7.8130  |
| H59  | 1.4960  | -3.9630 | 7.5750  |
| H60  | 4.1520  | -4.9080 | 6.3230  |
| H61  | 3.5640  | -5.1010 | 4.6700  |
| H62  | 2.5620  | -5.7190 | 6.0430  |
| H63  | 0.8850  | -2.5500 | 5.0840  |
| H64  | 0.6530  | -4.3180 | 5.2170  |
| H65  | 2.7940  | -3.1730 | 3.3440  |
| H66  | 1.8540  | -4.7000 | 3.1320  |
| H67  | -1.0770 | -2.7410 | 1.8940  |
| H68  | -0.8400 | -3.2360 | 3.5710  |
| H69  | -0.5340 | -4.4410 | 2.2510  |
| H70  | 2.5390  | -2.7030 | 1.1600  |
| H71  | 1.5070  | -4.1050 | 0.8390  |
| H72  | 1.3260  | -2.2670 | -0.9310 |
| H73  | -0.2180 | -2.7580 | -0.2410 |
| H74  | -0.8020 | 0.7550  | -0.1930 |
| H75  | -1.4540 | -0.8560 | -0.5040 |
| H76  | -0.1380 | -0.2210 | -1.5660 |
| H77  | 2.1380  | 0.0990  | -0.5030 |
| H78  | 2.4150  | -0.5590 | 1.1380  |
| H79  | 1.0230  | 2.0740  | 0.4270  |
| H80  | 0.4870  | 1.1380  | 1.8670  |
| H81  | 2.6570  | 1.4780  | 4.8360  |
| Br82 | 1.8820  | -0.3190 | 3.8820  |

S12 - Cartesian Coordinates, atomic charges and atom types for the cluster  $[\text{F}(\text{H}_2\text{O})_{12}]^{12+}$ 

|     | x       | y       | z       | Atomic charge | Atom type |
|-----|---------|---------|---------|---------------|-----------|
| F1  | 0.8580  | 0.2250  | 0.1630  | -1            | F         |
| O2  | 0.8500  | -2.2410 | 1.4560  | -0.325        | O2        |
| H3  | 0.5470  | -1.6850 | 0.7460  | 0.162         | HO        |
| H4  | 1.4030  | -1.6290 | 1.9170  | 0.162         | HO        |
| O5  | -0.9830 | 2.2470  | 0.9730  | -0.325        | O2        |
| H6  | -1.1850 | 1.5760  | 1.6050  | 0.162         | HO        |
| H7  | -0.3120 | 1.8100  | 0.4570  | 0.162         | HO        |
| O8  | 2.4420  | -1.8260 | -1.0370 | -0.325        | O2        |
| H9  | 1.9170  | -1.0460 | -0.8900 | 0.162         | HO        |
| H10 | 2.5240  | -2.1550 | -0.1570 | 0.162         | HO        |
| O11 | 3.2290  | -0.1970 | 1.6170  | -0.325        | O2        |
| H12 | 2.5830  | -0.2970 | 0.9240  | 0.162         | HO        |
| H13 | 2.8330  | 0.4960  | 2.1220  | 0.162         | HO        |
| O14 | 0.2900  | 1.9880  | -1.8960 | -0.325        | O2        |
| H15 | 0.1820  | 1.2070  | -1.3650 | 0.162         | HO        |
| H16 | 0.9960  | 2.4110  | -1.4340 | 0.162         | HO        |
| O17 | 0.4470  | 0.3830  | 2.9480  | -0.325        | O2        |
| H18 | 0.7720  | 0.5770  | 2.0740  | 0.162         | HO        |
| H19 | -0.1170 | -0.3510 | 2.7650  | 0.162         | HO        |
| O20 | -0.5070 | -1.3020 | -1.7890 | -0.325        | O2        |
| H21 | -0.2510 | -0.7150 | -1.0850 | 0.162         | HO        |
| H22 | 0.3210  | -1.6930 | -2.0150 | 0.162         | HO        |
| O23 | -1.7550 | -0.6510 | 0.9760  | -0.325        | O2        |
| H24 | -1.9160 | -0.9640 | 0.1000  | 0.162         | HO        |
| H25 | -0.8690 | -0.3110 | 0.8940  | 0.162         | HO        |
| O26 | 3.1770  | 1.1510  | -1.2160 | -0.325        | O2        |
| H27 | 3.5460  | 1.0900  | -0.3500 | 0.162         | HO        |
| H28 | 2.2860  | 0.8570  | -1.0520 | 0.162         | HO        |
| O29 | 2.0020  | 2.6060  | 1.2220  | -0.325        | O2        |
| H30 | 1.1710  | 2.6750  | 1.6640  | 0.162         | HO        |
| H31 | 1.8640  | 1.8230  | 0.6980  | 0.162         | HO        |
| O32 | 1.7730  | -0.2220 | -3.6400 | -0.325        | O2        |
| H33 | 1.0660  | 0.2120  | -3.1870 | 0.162         | HO        |
| H34 | 2.3950  | -0.3750 | -2.9440 | 0.162         | HO        |
| O35 | -2.6290 | 0.9920  | -1.5250 | -0.325        | O2        |
| H36 | -2.2430 | 1.2950  | -0.7170 | 0.162         | HO        |
| H37 | -1.8910 | 0.6020  | -1.9680 | 0.162         | HO        |



S13 - Cartesian Coordinates, atomic charges and atom types for the cluster  $[\text{Cl}(\text{H}_2\text{O})_{12}]^{12+}$ 

|     | x       | y       | z       | Atomic charge | Atom type |
|-----|---------|---------|---------|---------------|-----------|
| C11 | 0.7000  | 0.3540  | -0.0440 | -1            | Cl        |
| O2  | 0.7140  | -2.5340 | 1.4880  | -0.325        | O2        |
| H3  | -0.1170 | -2.5280 | 1.0410  | 0.162         | HO        |
| H4  | 1.0650  | -1.6840 | 1.2580  | 0.162         | HO        |
| O5  | -1.3990 | 2.4790  | 1.0040  | -0.325        | O2        |
| H6  | -1.4280 | 1.5420  | 1.1290  | 0.162         | HO        |
| H7  | -0.6250 | 2.5670  | 0.4670  | 0.162         | HO        |
| O8  | 2.6690  | -2.0190 | -1.0680 | -0.325        | O2        |
| H9  | 2.4160  | -1.1080 | -1.0080 | 0.162         | HO        |
| H10 | 1.9770  | -2.4420 | -0.5840 | 0.162         | HO        |
| O11 | 3.2520  | -0.1940 | 1.7520  | -0.325        | O2        |
| H12 | 2.8800  | -0.7180 | 1.0580  | 0.162         | HO        |
| H13 | 2.6560  | 0.5410  | 1.7650  | 0.162         | HO        |
| O14 | 0.5660  | 3.0110  | -1.7870 | -0.325        | O2        |
| H15 | 0.2140  | 2.1850  | -2.0820 | 0.162         | HO        |
| H16 | 0.9020  | 2.7730  | -0.9340 | 0.162         | HO        |
| O17 | 0.3880  | 0.3900  | 3.1580  | -0.325        | O2        |
| H18 | 0.1470  | 0.8280  | 2.3530  | 0.162         | HO        |
| H19 | 0.9500  | -0.2980 | 2.8350  | 0.162         | HO        |
| O20 | -0.4040 | -2.2980 | -1.5540 | -0.325        | O2        |
| H21 | -0.4280 | -1.6780 | -0.8380 | 0.162         | HO        |
| H22 | 0.3010  | -1.9540 | -2.0790 | 0.162         | HO        |
| O23 | -1.9850 | -0.8620 | 1.1160  | -0.325        | O2        |
| H24 | -1.8420 | -0.5150 | 0.2480  | 0.162         | HO        |
| H25 | -1.1460 | -0.6910 | 1.5210  | 0.162         | HO        |
| O26 | 3.4360  | 1.3040  | -1.3130 | -0.325        | O2        |
| H27 | 3.2990  | 0.7650  | -0.5480 | 0.162         | HO        |
| H28 | 2.5430  | 1.5110  | -1.5520 | 0.162         | HO        |
| O29 | 1.9910  | 2.8940  | 1.3350  | -0.325        | O2        |
| H30 | 1.2060  | 2.4190  | 1.5650  | 0.162         | HO        |
| H31 | 2.3060  | 2.3820  | 0.6050  | 0.162         | HO        |
| O32 | 1.2630  | -0.0500 | -3.2370 | -0.325        | O2        |
| H33 | 0.7260  | 0.1720  | -2.4890 | 0.162         | HO        |
| H34 | 2.1080  | -0.1830 | -2.8380 | 0.162         | HO        |
| O35 | -1.8670 | 0.7540  | -1.8590 | -0.325        | O2        |
| H36 | -1.5230 | 1.3010  | -1.1680 | 0.162         | HO        |
| H37 | -1.2400 | 0.0450  | -1.8590 | 0.162         | HO        |

S14 - Cartesian Coordinates, atomic charges and atom types for the cluster  $[\text{Br}(\text{H}_2\text{O})_{12}]^{12+}$ 

|     | x       | y       | z       | Atomic charge | Atom type |
|-----|---------|---------|---------|---------------|-----------|
| Br1 | 0.7060  | 0.2300  | -0.0820 | -1            | Br        |
| O2  | 0.8540  | -2.6180 | 1.6380  | -0.325        | O2        |
| H3  | 0.1500  | -2.2090 | 1.1580  | 0.162         | HO        |
| H4  | 1.5640  | -2.0140 | 1.4810  | 0.162         | HO        |
| O5  | -1.4540 | 2.5420  | 0.9280  | -0.325        | O2        |
| H6  | -1.4600 | 1.6070  | 1.0720  | 0.162         | HO        |
| H7  | -0.6990 | 2.6420  | 0.3680  | 0.162         | HO        |
| O8  | 2.7990  | -2.1470 | -1.0890 | -0.325        | O2        |
| H9  | 2.8270  | -1.2020 | -1.0530 | 0.162         | HO        |
| H10 | 1.9370  | -2.3230 | -0.7400 | 0.162         | HO        |
| O11 | 3.3540  | -0.1770 | 1.8840  | -0.325        | O2        |
| H12 | 3.0540  | -0.5620 | 1.0740  | 0.162         | HO        |
| H13 | 2.6570  | 0.4350  | 2.0710  | 0.162         | HO        |
| O14 | 0.6720  | 3.1390  | -1.7140 | -0.325        | O2        |
| H15 | 0.2210  | 2.3130  | -1.8090 | 0.162         | HO        |
| H16 | 1.2310  | 2.9630  | -0.9720 | 0.162         | HO        |
| O17 | 0.2800  | 0.3380  | 3.2240  | -0.325        | O2        |
| H18 | 0.1170  | 0.9330  | 2.5070  | 0.162         | HO        |
| H19 | 0.6580  | -0.4020 | 2.7730  | 0.162         | HO        |
| O20 | -0.5340 | -2.4190 | -1.6850 | -0.325        | O2        |
| H21 | -0.6740 | -2.0230 | -0.8370 | 0.162         | HO        |
| H22 | 0.1310  | -1.8540 | -2.0490 | 0.162         | HO        |
| O23 | -2.1850 | -0.8590 | 1.1360  | -0.325        | O2        |
| H24 | -1.9720 | -0.5710 | 0.2610  | 0.162         | HO        |
| H25 | -1.3720 | -0.7000 | 1.5910  | 0.162         | HO        |
| O26 | 3.5510  | 1.3680  | -1.3700 | -0.325        | O2        |
| H27 | 3.3070  | 0.9260  | -0.5700 | 0.162         | HO        |
| H28 | 2.7140  | 1.4490  | -1.8030 | 0.162         | HO        |
| O29 | 2.0390  | 2.9010  | 1.3960  | -0.325        | O2        |
| H30 | 1.1820  | 2.5070  | 1.4660  | 0.162         | HO        |
| H31 | 2.4690  | 2.3080  | 0.7990  | 0.162         | HO        |
| O32 | 1.2040  | -0.0220 | -3.3660 | -0.325        | O2        |
| H33 | 0.5590  | 0.4510  | -2.8610 | 0.162         | HO        |
| H34 | 1.7330  | -0.4060 | -2.6830 | 0.162         | HO        |
| O35 | -1.9830 | 0.6920  | -1.9760 | -0.325        | O2        |
| H36 | -1.6490 | 1.2180  | -1.2640 | 0.162         | HO        |
| H37 | -1.3800 | -0.0370 | -1.9710 | 0.162         | HO        |

S15 - Cartesian Coordinates, atomic charges and atom types for the cluster of twelve H<sub>2</sub>O

|     | x       | y       | z       | Atomic charge | Atom type |
|-----|---------|---------|---------|---------------|-----------|
| O1  | 0.6910  | -2.3950 | 2.2800  | -0.325        | O2        |
| H2  | -0.1280 | -2.1610 | 2.6860  | 0.162         | HO        |
| H3  | 0.4490  | -2.5690 | 1.3840  | 0.162         | HO        |
| O4  | -1.4620 | 2.2370  | 0.8440  | -0.325        | O2        |
| H5  | -0.9650 | 3.0240  | 0.6880  | 0.162         | HO        |
| H6  | -1.8400 | 2.0340  | 0.0030  | 0.162         | HO        |
| O7  | 2.8990  | -0.5170 | -2.2590 | -0.325        | O2        |
| H8  | 3.3860  | -1.0080 | -1.6180 | 0.162         | HO        |
| H9  | 2.9020  | 0.3630  | -1.9190 | 0.162         | HO        |
| O10 | 3.1390  | -1.3460 | 0.7490  | -0.325        | O2        |
| H11 | 3.2120  | -1.9690 | 1.4540  | 0.162         | HO        |
| H12 | 2.2080  | -1.2880 | 0.6040  | 0.162         | HO        |
| O13 | 0.7380  | 1.4780  | -1.2180 | -0.325        | O2        |
| H14 | 0.5200  | 1.2240  | -0.3350 | 0.162         | HO        |
| H15 | 1.2620  | 2.2540  | -1.1010 | 0.162         | HO        |
| O16 | 1.0420  | 0.7000  | 1.9210  | -0.325        | O2        |
| H17 | 0.1020  | 0.7820  | 1.9580  | 0.162         | HO        |
| H18 | 1.2100  | -0.1190 | 2.3580  | 0.162         | HO        |
| O19 | 0.2850  | -1.5870 | -0.7150 | -0.325        | O2        |
| H20 | 0.8640  | -1.0470 | -1.2280 | 0.162         | HO        |
| H21 | -0.4340 | -1.7570 | -1.3020 | 0.162         | HO        |
| O22 | -1.7470 | -0.7050 | 1.6160  | -0.325        | O2        |
| H23 | -2.2280 | 0.1030  | 1.6940  | 0.162         | HO        |
| H24 | -1.6000 | -0.7860 | 0.6870  | 0.162         | HO        |
| O25 | 3.5470  | 1.5700  | 0.0960  | -0.325        | O2        |
| H26 | 2.8900  | 1.1390  | 0.6190  | 0.162         | HO        |
| H27 | 4.3080  | 1.0230  | 0.2040  | 0.162         | HO        |
| O28 | 1.3810  | 3.6240  | 0.8560  | -0.325        | O2        |
| H29 | 1.3020  | 3.0230  | 1.5800  | 0.162         | HO        |
| H30 | 2.3030  | 3.6110  | 0.6540  | 0.162         | HO        |
| O31 | 0.1480  | -0.5020 | -3.5430 | -0.325        | O2        |
| H32 | 0.5440  | 0.3110  | -3.2700 | 0.162         | HO        |
| H33 | 0.8890  | -1.0470 | -3.7530 | 0.162         | HO        |
| O34 | -2.1290 | 0.1890  | -1.5000 | -0.325        | O2        |
| H35 | -2.5870 | -0.1200 | -2.2640 | 0.162         | HO        |
| H36 | -1.2740 | 0.4160  | -1.8280 | 0.162         | HO        |

S16 - Cartesian Coordinates (lowest energy conformer), atomic charges and atom types for the  $[L2H_2]^{2+}$ 

|     | x       | y       | z       | Atom type | Atomic charge |
|-----|---------|---------|---------|-----------|---------------|
| N1  | -0.3920 | -0.9160 | 1.9950  | N3        | 0.7230563     |
| C2  | 0.0270  | -1.4450 | 0.6990  | C4        | -0.2812724    |
| C3  | 1.4330  | -2.0940 | 0.6820  | C4        | -0.09176302   |
| N4  | 2.5030  | -1.1500 | 0.9960  | N3        | -0.06393003   |
| C5  | 2.6930  | -0.1950 | -0.0860 | C4        | -0.1265931    |
| C6  | 3.7450  | -1.8330 | 1.3500  | C4        | -0.08111572   |
| C7  | 4.8590  | -0.9680 | 1.9890  | C4        | -0.07867479   |
| N8  | 4.6510  | -0.5800 | 3.3830  | N3        | -0.07015753   |
| C9  | 3.4250  | 0.1670  | 3.6160  | C4        | -0.1225615    |
| C10 | 3.3670  | 1.5980  | 3.0610  | C4        | -0.1435995    |
| C11 | 1.9760  | 2.2370  | 3.1910  | C4        | 0.07635355    |
| O12 | 1.0540  | 1.5240  | 2.3840  | O2        | -0.3044543    |
| C13 | -0.1660 | 2.2240  | 2.2340  | C4        | 0.04134893    |
| C14 | -1.0770 | 1.4350  | 1.2820  | C4        | -0.1182919    |
| C15 | -1.4760 | 0.0510  | 1.8440  | C4        | -0.2721381    |
| C16 | -0.7930 | -2.0020 | 2.8900  | C4        | -0.2818265    |
| C17 | -0.8460 | -1.6620 | 4.4010  | C4        | -0.0931716    |
| N18 | 0.4270  | -1.2420 | 4.9860  | N3        | -0.05817223   |
| C19 | 1.4230  | -2.2970 | 4.8920  | C4        | -0.135571     |
| C20 | 0.2390  | -0.7950 | 6.3680  | C4        | -0.08494043   |
| C21 | 1.4030  | 0.0000  | 7.0060  | C4        | -0.08155966   |
| N22 | 2.6530  | -0.7020 | 7.2780  | N3        | -0.07780695   |
| C23 | 2.4610  | -1.8400 | 8.1620  | C4        | -0.1285276    |
| C24 | 3.6810  | 0.2070  | 7.7820  | C4        | -0.09937334   |
| C25 | 5.1050  | -0.3910 | 7.6650  | C4        | -0.2861695    |
| N26 | 5.4560  | -0.7980 | 6.3110  | N3        | 0.7530165     |
| C27 | 6.5360  | -1.7590 | 6.3200  | C4        | -0.3094578    |
| C28 | 5.7610  | 0.3430  | 5.4590  | C4        | -0.2851648    |
| C29 | 5.8450  | 0.0480  | 3.9420  | C4        | -0.09459972   |
| H30 | 0.4070  | -0.4340 | 2.4140  | HB        | 0.1040388     |
| H31 | -0.7330 | -2.1760 | 0.3330  | H         | 0.1181231     |
| H32 | 0.0080  | -0.6410 | -0.0650 | H         | 0.129692      |
| H33 | 1.4630  | -2.9550 | 1.3870  | H         | 0.07114351    |
| H34 | 1.6330  | -2.5580 | -0.3170 | H         | 0.08740127    |
| H35 | 3.5420  | 0.4940  | 0.0990  | H         | 0.06938487    |
| H36 | 1.8130  | 0.4720  | -0.2000 | H         | 0.05438304    |
| H37 | 2.8960  | -0.7050 | -1.0570 | H         | 0.05457526    |
| H38 | 4.1440  | -2.3380 | 0.4350  | H         | 0.06720191    |
| H39 | 3.5340  | -2.6430 | 2.0860  | H         | 0.06254864    |
| H40 | 5.7790  | -1.5990 | 1.9500  | H         | 0.0698868     |
| H41 | 5.1070  | -0.0780 | 1.3680  | H         | 0.0605371     |
| H42 | 3.2150  | 0.1960  | 4.7060  | H         | 0.04986489    |
| H43 | 2.5710  | -0.4090 | 3.2060  | H         | 0.09700817    |
| H44 | 3.6600  | 1.6300  | 1.9870  | H         | 0.08233613    |
| H45 | 4.0940  | 2.2500  | 3.5990  | H         | 0.06107128    |
| H46 | 1.6160  | 2.2090  | 4.2470  | H         | 0.03527898    |
| H47 | 2.0340  | 3.2990  | 2.8460  | H         | 0.06041533    |
| H48 | 0.0400  | 3.2330  | 1.7960  | H         | 0.07361948    |
| H49 | -0.6390 | 2.3450  | 3.2380  | H         | 0.0484457     |
| H50 | -0.5980 | 1.3850  | 0.2750  | H         | 0.08647299    |
| H51 | -2.0020 | 2.0480  | 1.1190  | H         | 0.1092466     |
| H52 | -1.9380 | 0.2530  | 2.8360  | H         | 0.1172011     |
| H53 | -2.2870 | -0.3960 | 1.2190  | H         | 0.1182885     |
| H54 | -1.7920 | -2.3830 | 2.5680  | H         | 0.1189933     |

|     |         |         |        |    |            |
|-----|---------|---------|--------|----|------------|
| H55 | -0.1330 | -2.8840 | 2.7570 | H  | 0.1215782  |
| H56 | -1.6170 | -0.8780 | 4.5870 | H  | 0.08022833 |
| H57 | -1.2230 | -2.5550 | 4.9630 | H  | 0.08195072 |
| H58 | 1.6610  | -2.5440 | 3.8360 | H  | 0.04524225 |
| H59 | 1.0880  | -3.2250 | 5.4110 | H  | 0.05156237 |
| H60 | 2.3920  | -1.9820 | 5.3280 | H  | 0.06859231 |
| H61 | -0.0870 | -1.6430 | 7.0150 | H  | 0.06298554 |
| H62 | -0.6230 | -0.0850 | 6.3850 | H  | 0.07025713 |
| H63 | 1.6080  | 0.8540  | 6.3180 | H  | 0.06342703 |
| H64 | 1.0390  | 0.4500  | 7.9630 | H  | 0.06532955 |
| H65 | 1.7300  | -2.5670 | 7.7470 | H  | 0.07062066 |
| H66 | 2.0960  | -1.5220 | 9.1670 | H  | 0.06177574 |
| H67 | 3.3950  | -2.4290 | 8.2890 | H  | 0.04919648 |
| H68 | 3.6310  | 1.1830  | 7.2440 | H  | 0.07777983 |
| H69 | 3.4540  | 0.4730  | 8.8470 | H  | 0.09404761 |
| H70 | 5.8670  | 0.3290  | 8.0510 | H  | 0.1264161  |
| H71 | 5.1760  | -1.2610 | 8.3550 | H  | 0.1282173  |
| H72 | 7.4720  | -1.3220 | 6.7390 | H  | 0.1242542  |
| H73 | 6.7380  | -2.1390 | 5.2950 | H  | 0.1231799  |
| H74 | 6.2580  | -2.6540 | 6.9200 | H  | 0.1171947  |
| H75 | 6.7210  | 0.8040  | 5.7960 | H  | 0.1238692  |
| H76 | 5.0050  | 1.1420  | 5.6110 | H  | 0.1199434  |
| H77 | 6.0560  | 0.9960  | 3.3870 | H  | 0.08358592 |
| H78 | 6.7370  | -0.5880 | 3.7280 | H  | 0.0853352  |
| H79 | 4.6340  | -1.2630 | 5.9160 | HB | 0.07338792 |

S17 - Cartesian Coordinates (lowest energy conformer), atomic charges and atom types for the  $[L2H_3]^{3+}$ 

|     | x       | y       | z       | Atom type | Atomic charge |
|-----|---------|---------|---------|-----------|---------------|
| N1  | -0.1010 | 1.5030  | 4.4340  | N3        | 0.7349024     |
| C2  | -0.8320 | 1.7510  | 3.1900  | C4        | -0.2898269    |
| C3  | -0.5540 | 0.7950  | 2.0020  | C4        | -0.08582211   |
| N4  | 0.8100  | 0.8840  | 1.4850  | N3        | -0.08999109   |
| C5  | 1.0500  | 2.1630  | 0.8300  | C4        | -0.1272497    |
| C6  | 1.1510  | -0.2350 | 0.6130  | C4        | -0.07672167   |
| C7  | 2.6740  | -0.4770 | 0.4250  | C4        | -0.2867141    |
| N8  | 3.3720  | -1.0070 | 1.5890  | N3        | 0.755178      |
| C9  | 3.3480  | -0.1110 | 2.7390  | C4        | -0.286798     |
| C10 | 4.0690  | 1.2540  | 2.6390  | C4        | -0.1121817    |
| C11 | 3.8380  | 2.1540  | 3.8690  | C4        | 0.07767057    |
| O12 | 2.4610  | 2.4860  | 3.9480  | O2        | -0.3228946    |
| C13 | 2.2200  | 3.5510  | 4.8520  | C4        | 0.04778719    |
| C14 | 0.7150  | 3.8720  | 4.8690  | C4        | -0.120368     |
| C15 | -0.1540 | 2.6660  | 5.3100  | C4        | -0.2837663    |
| C16 | -0.5810 | 0.2820  | 5.0870  | C4        | -0.2749348    |
| C17 | 0.0880  | -0.1970 | 6.4050  | C4        | -0.1081815    |
| N18 | 1.4760  | -0.6390 | 6.2390  | N3        | -0.06692076   |
| C19 | 2.3400  | -0.0290 | 7.2340  | C4        | -0.1231012    |
| C20 | 1.5880  | -2.1020 | 6.2220  | C4        | -0.07942963   |
| C21 | 3.0290  | -2.6600 | 6.0780  | C4        | -0.2947807    |
| N22 | 3.1430  | -4.0490 | 5.6520  | N3        | 0.755918      |
| C23 | 2.5130  | -4.9600 | 6.5800  | C4        | -0.3150978    |
| C24 | 4.5140  | -4.4520 | 5.3730  | C4        | -0.2866421    |
| C25 | 5.3450  | -3.5600 | 4.4120  | C4        | -0.09095573   |
| N26 | 4.6500  | -3.1320 | 3.2000  | N3        | -0.1378055    |
| C27 | 4.2470  | -4.2560 | 2.3710  | C4        | -0.1231318    |
| C28 | 5.4600  | -2.1700 | 2.4480  | C4        | -0.09044027   |
| C29 | 4.7080  | -1.4860 | 1.2760  | C4        | -0.2871203    |
| H30 | 0.8790  | 1.3510  | 4.1910  | HB        | 0.06891751    |
| H31 | 2.6330  | -4.1260 | 4.7680  | HB        | 0.035519      |
| H32 | 2.8430  | -1.8370 | 1.8720  | HB        | 0.0335111     |
| H33 | -1.9280 | 1.7540  | 3.4070  | H         | 0.1360039     |
| H34 | -0.6440 | 2.7880  | 2.8430  | H         | 0.1459347     |
| H35 | -0.7870 | -0.2500 | 2.3080  | H         | 0.05956596    |
| H36 | -1.2760 | 0.9960  | 1.1670  | H         | 0.1064005     |
| H37 | 2.0340  | 2.2050  | 0.3180  | H         | 0.06626201    |
| H38 | 1.0700  | 3.0000  | 1.5620  | H         | 0.07362676    |
| H39 | 0.2810  | 2.3840  | 0.0510  | H         | 0.07598579    |
| H40 | 0.6390  | -0.0950 | -0.3760 | H         | 0.1108378     |
| H41 | 0.7340  | -1.1840 | 1.0300  | H         | 0.05134219    |
| H42 | 2.7600  | -1.2340 | -0.3910 | H         | 0.1305069     |
| H43 | 3.2060  | 0.4170  | 0.0290  | H         | 0.1468954     |
| H44 | 3.7580  | -0.6520 | 3.6170  | H         | 0.09490329    |
| H45 | 2.2880  | 0.0480  | 3.0220  | H         | 0.1204548     |
| H46 | 3.7480  | 1.8440  | 1.7490  | H         | 0.09457821    |
| H47 | 5.1730  | 1.1130  | 2.5290  | H         | 0.08924031    |
| H48 | 4.1280  | 1.6310  | 4.8110  | H         | 0.03908479    |
| H49 | 4.4480  | 3.0880  | 3.7640  | H         | 0.0888952     |
| H50 | 2.7900  | 4.4560  | 4.5220  | H         | 0.08842146    |
| H51 | 2.5700  | 3.2490  | 5.8690  | H         | 0.04929054    |
| H52 | 0.4200  | 4.2980  | 3.8800  | H         | 0.09150743    |
| H53 | 0.5600  | 4.7260  | 5.5800  | H         | 0.1259424     |
| H54 | 0.2310  | 2.3980  | 6.3150  | H         | 0.1226434     |

|     |         |         |        |   |            |
|-----|---------|---------|--------|---|------------|
| H55 | -1.2170 | 2.9760  | 5.4620 | H | 0.1351034  |
| H56 | -1.6730 | 0.4090  | 5.2900 | H | 0.1375297  |
| H57 | -0.4910 | -0.5640 | 4.3720 | H | 0.1003268  |
| H58 | -0.0130 | 0.5510  | 7.2290 | H | 0.1086905  |
| H59 | -0.5270 | -1.0300 | 6.8310 | H | 0.09576547 |
| H60 | 3.4150  | -0.2240 | 7.0220 | H | 0.08421075 |
| H61 | 2.1020  | -0.3900 | 8.2630 | H | 0.06116819 |
| H62 | 2.2450  | 1.0810  | 7.2160 | H | 0.06955469 |
| H63 | 0.9740  | -2.4730 | 5.3660 | H | 0.04068393 |
| H64 | 1.1390  | -2.5060 | 7.1650 | H | 0.07689112 |
| H65 | 3.5330  | -2.0290 | 5.3190 | H | 0.1148841  |
| H66 | 3.5910  | -2.5440 | 7.0370 | H | 0.1447254  |
| H67 | 2.9720  | -4.9070 | 7.5940 | H | 0.1418518  |
| H68 | 2.5860  | -6.0110 | 6.2180 | H | 0.1353608  |
| H69 | 1.4250  | -4.7500 | 6.6680 | H | 0.1187558  |
| H70 | 5.0690  | -4.5380 | 6.3400 | H | 0.1480806  |
| H71 | 4.4970  | -5.4920 | 4.9680 | H | 0.143571   |
| H72 | 5.7040  | -2.6650 | 4.9780 | H | 0.08502382 |
| H73 | 6.2900  | -4.0980 | 4.1290 | H | 0.1158701  |
| H74 | 5.1310  | -4.8120 | 1.9780 | H | 0.05606478 |
| H75 | 3.6290  | -3.9240 | 1.5080 | H | 0.04768884 |
| H76 | 3.6070  | -4.9820 | 2.9190 | H | 0.0940491  |
| H77 | 6.3840  | -2.6770 | 2.0610 | H | 0.1156518  |
| H78 | 5.8570  | -1.3810 | 3.1340 | H | 0.08917344 |
| H79 | 5.3220  | -0.6440 | 0.8750 | H | 0.1469971  |
| H80 | 4.6420  | -2.2130 | 0.4320 | H | 0.1354756  |

S18 – Energy values (kcal/mol) for the lowest energy conformers used in  $\Delta E$  reaction energy calculations.

|                                                      | E (kcal/mol) |
|------------------------------------------------------|--------------|
| [L1H <sub>4</sub> ] <sup>4+</sup>                    | 383.07       |
| [L1H <sub>4</sub> F] <sup>3+</sup>                   | 53.98        |
| [L1H <sub>4</sub> Cl] <sup>3+</sup>                  | 70.91        |
| [L1H <sub>4</sub> Br] <sup>3+</sup>                  | 78.86        |
| [L1H <sub>5</sub> ] <sup>5+</sup>                    | 677.93       |
| [L1H <sub>5</sub> F] <sup>4+</sup>                   | 278.63       |
| [L2H <sub>4</sub> ] <sup>4+</sup>                    | 499.68       |
| [L2H <sub>4</sub> F] <sup>3+</sup>                   | 159.30       |
| [L2H <sub>4</sub> F(H <sub>2</sub> O)] <sup>3+</sup> | 152.02       |
| [L2H <sub>4</sub> Cl] <sup>3+</sup>                  | 186.50       |
| [L2H <sub>4</sub> Br] <sup>3+</sup>                  | 182.82       |
| [F(H <sub>2</sub> O) <sub>12</sub> ] <sup>12+</sup>  | -76.79       |
| [Cl(H <sub>2</sub> O) <sub>12</sub> ] <sup>12+</sup> | -63.76       |
| [Br(H <sub>2</sub> O) <sub>12</sub> ] <sup>12+</sup> | -59.14       |
| 12 H <sub>2</sub> O                                  | -16.97       |



Figure S1 - Lowest energy conformer of  $[L2H_2]^{2+}$

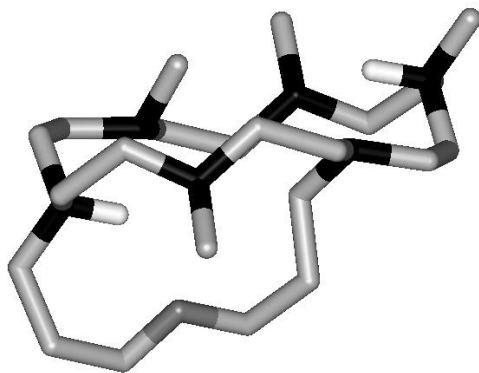

Figure S2 - Lowest energy conformer of  $[L2H_3]^{3+}$

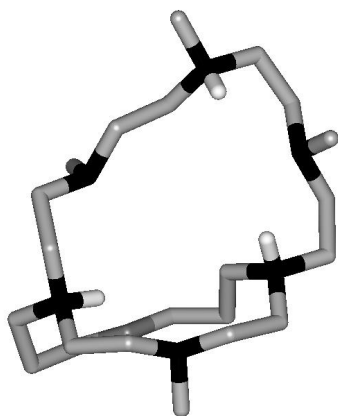

Supplement: b602795d.pdf [file b602795d.pdf]
